# Supplementary material for: IL-33-Induced Transcriptional Activation of LPIN1 Accelerates Breast Tumorigenesis
Source: MDPI journal article supplement (doi:10.3390/cancers13092174), 2021-04-30

Figure1. A

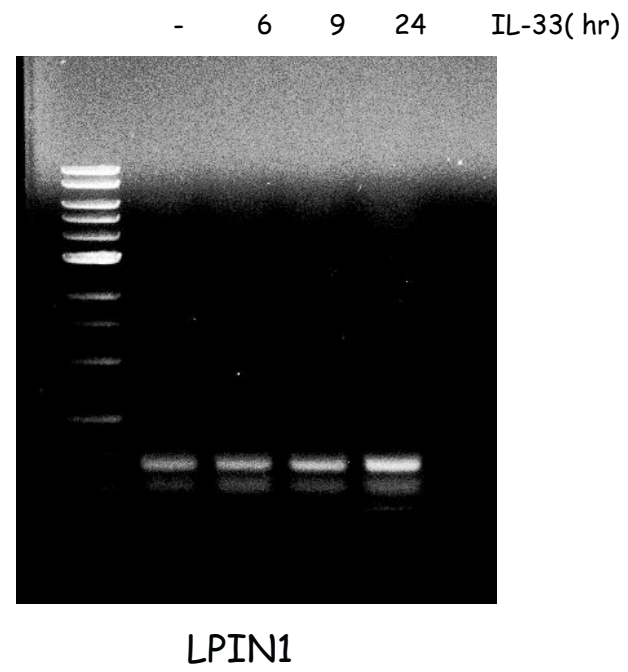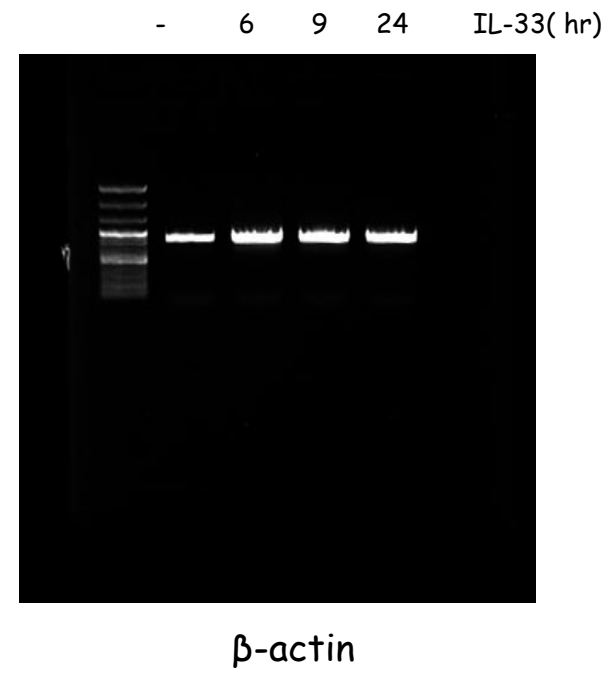

Figure1. C

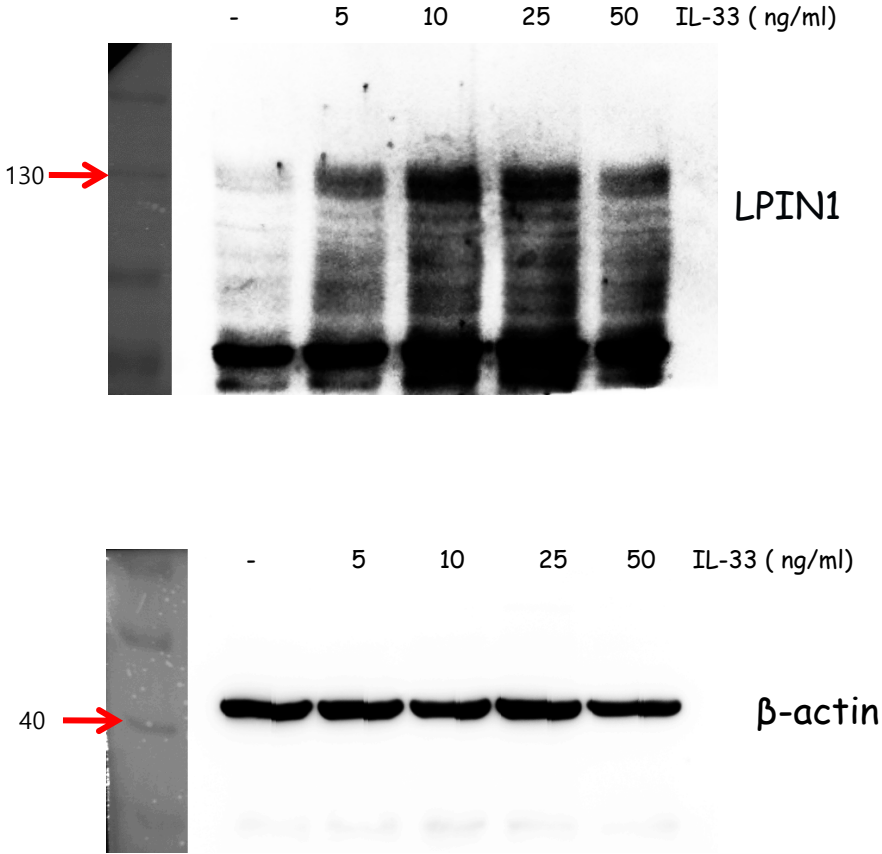

Figure1. D

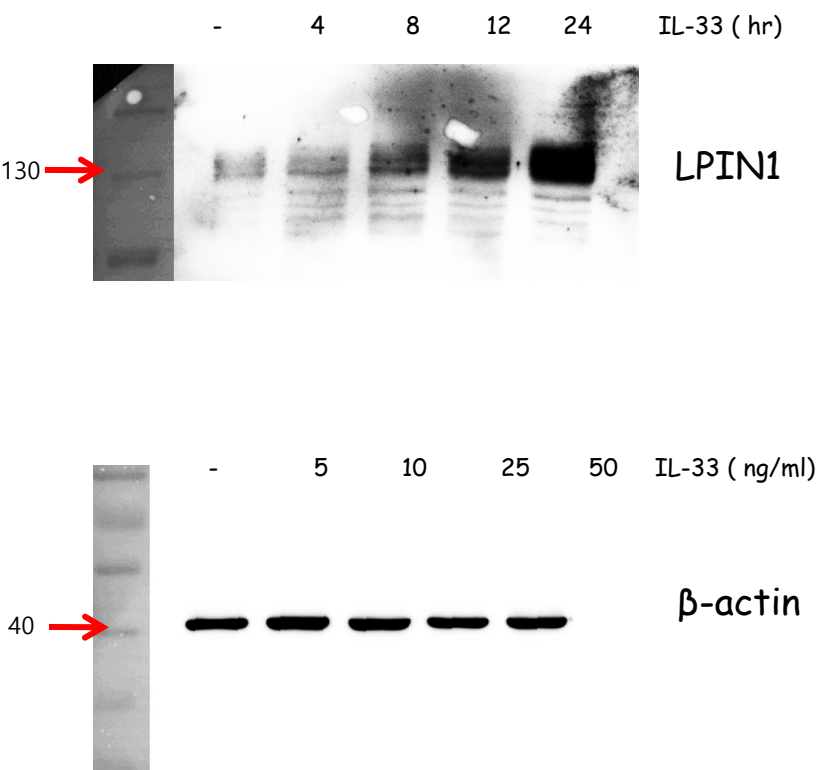

Figure1. E

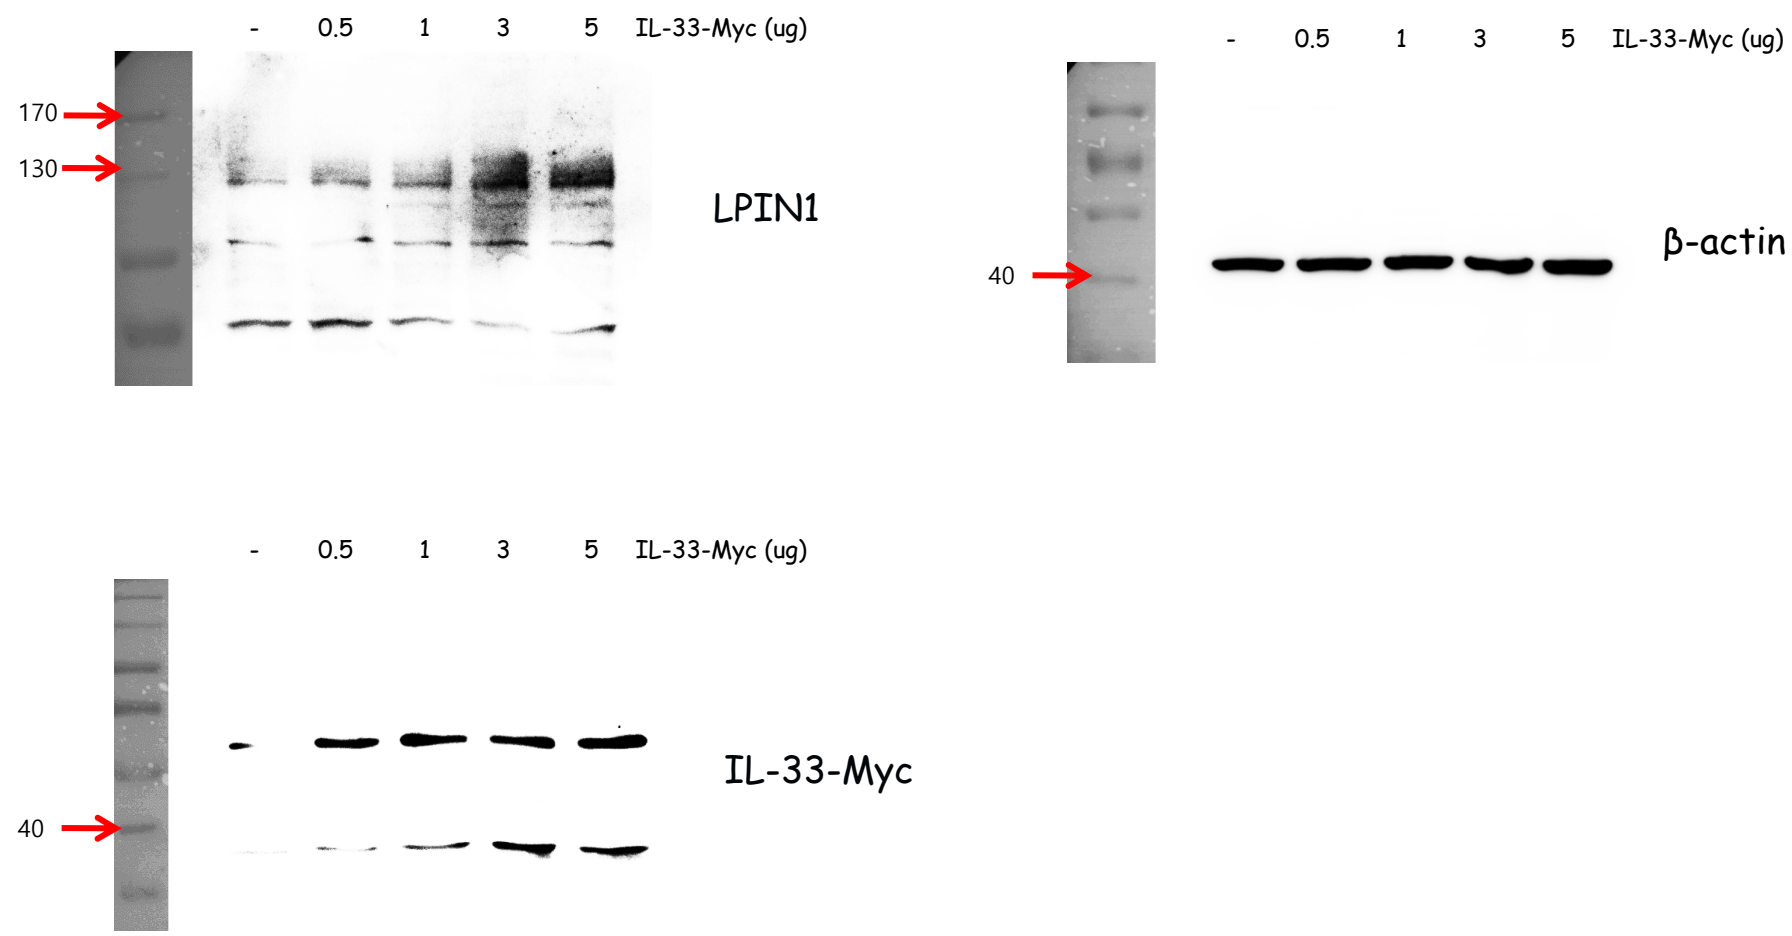

Figure1. F

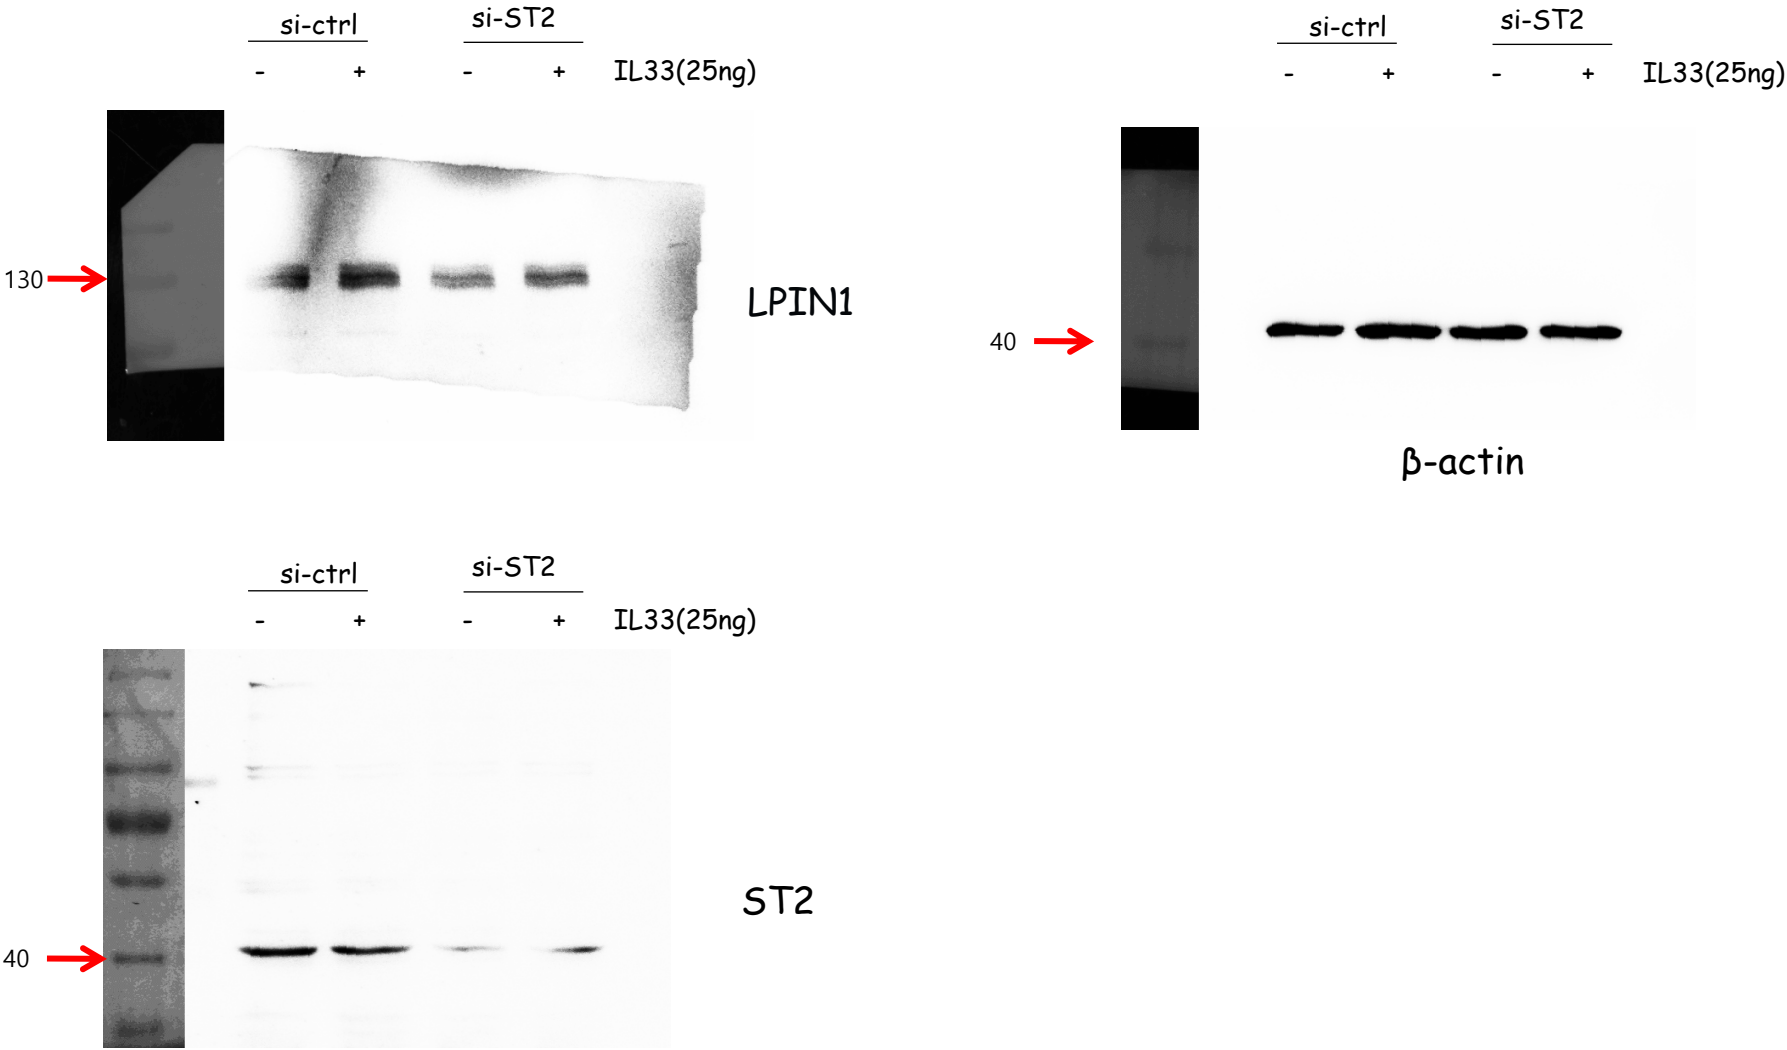

Figure2.A

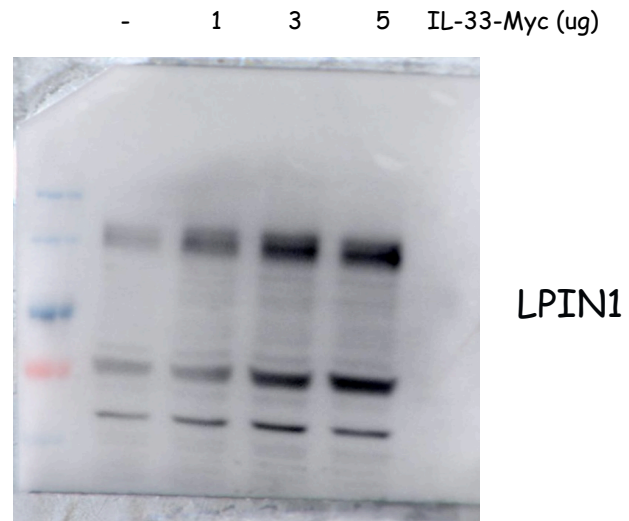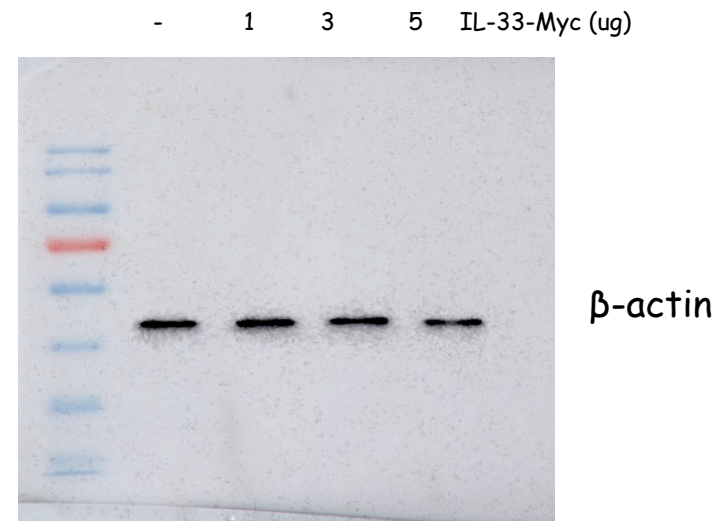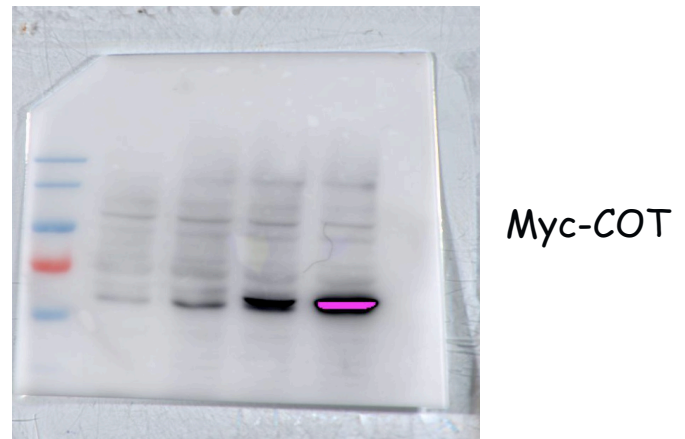

Figure 2.B

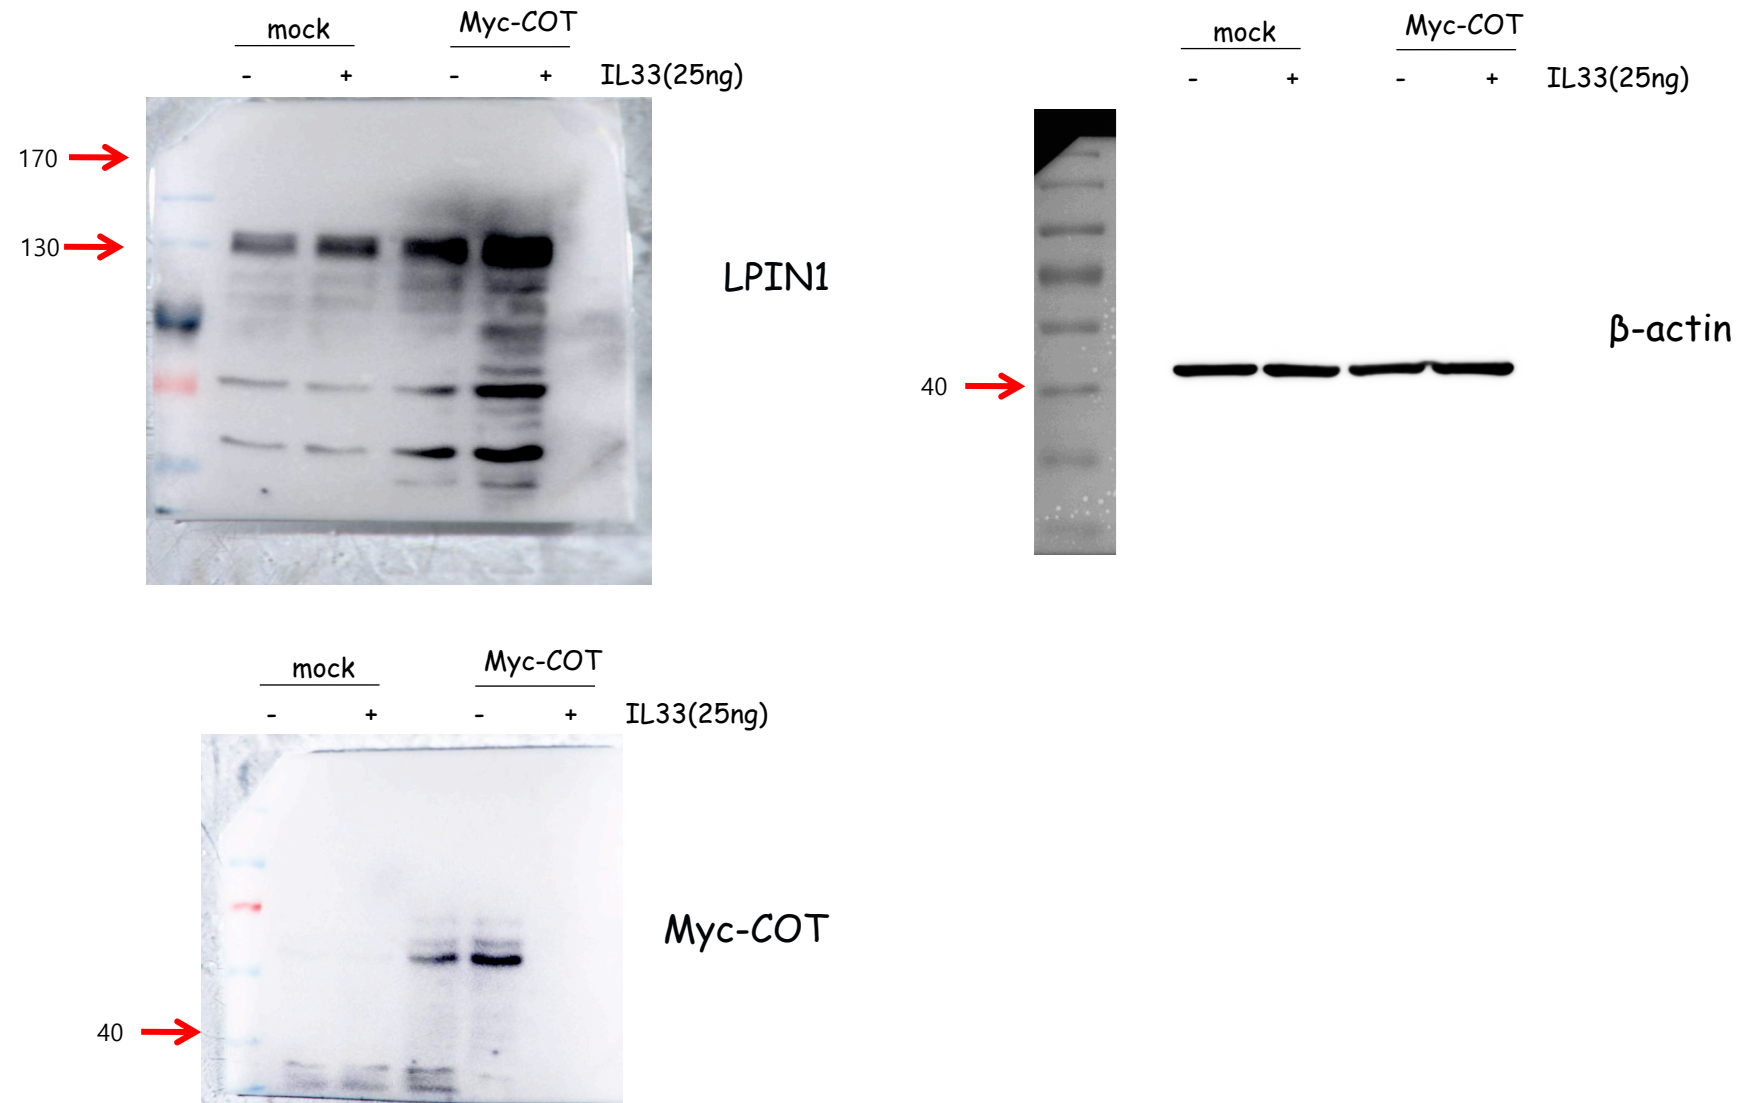

Figure 2.C

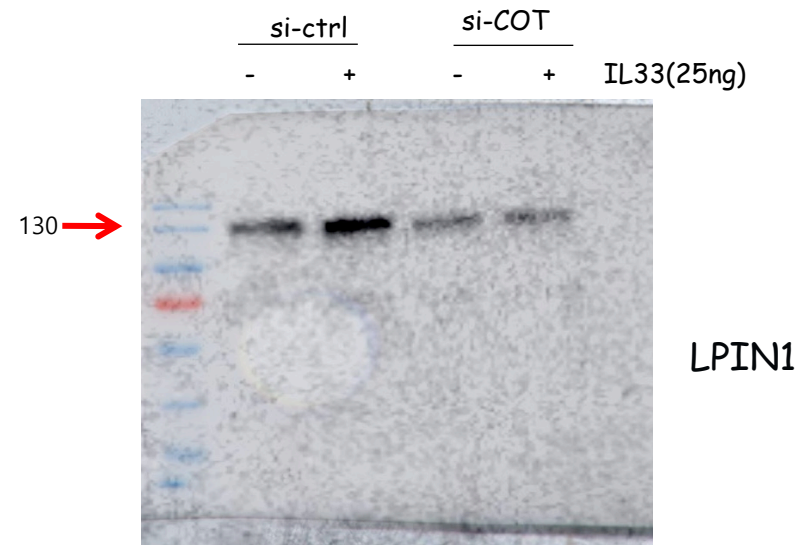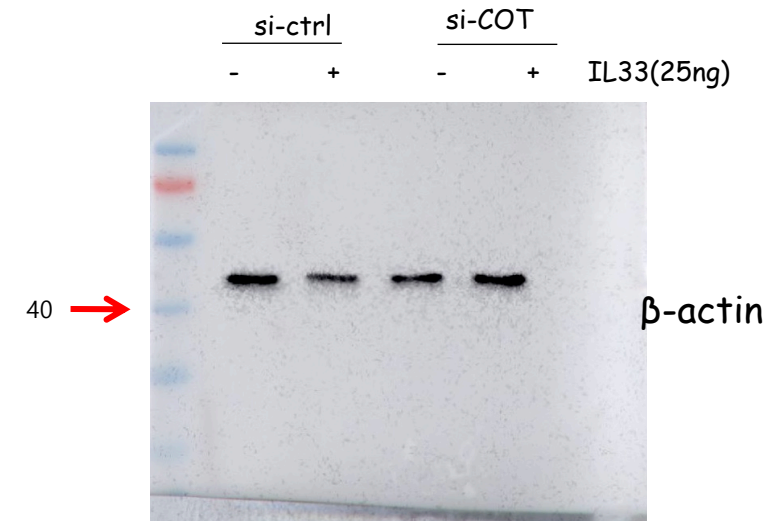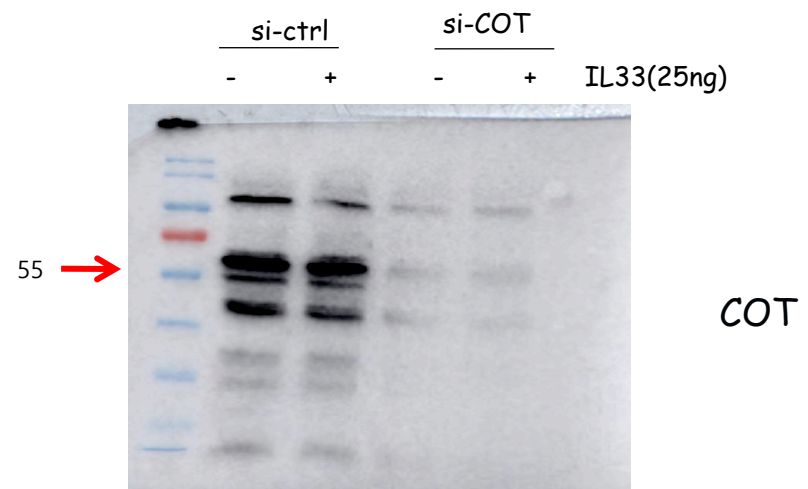

Figure2.D

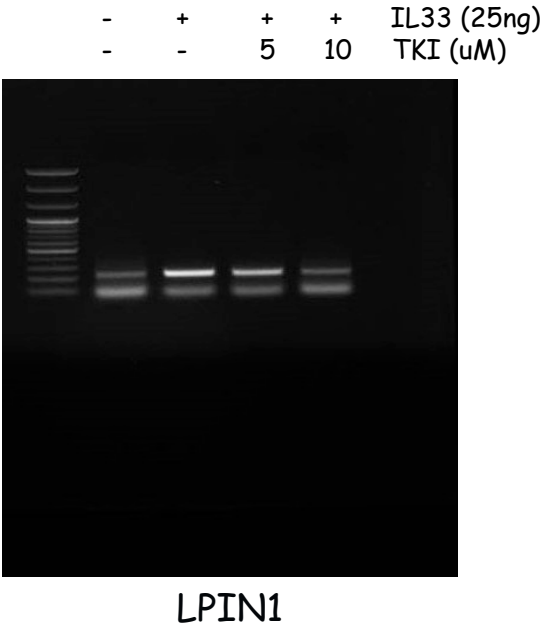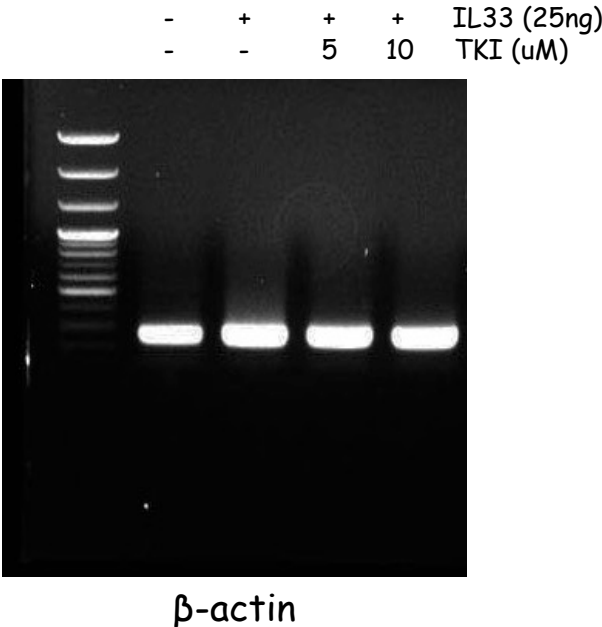



Figure2. F

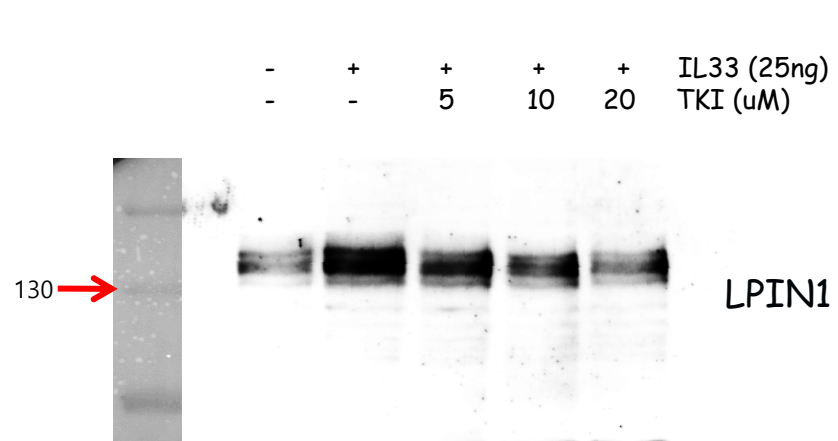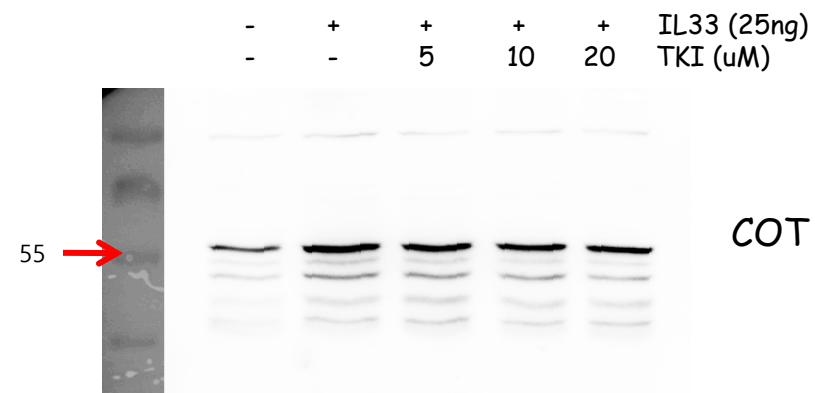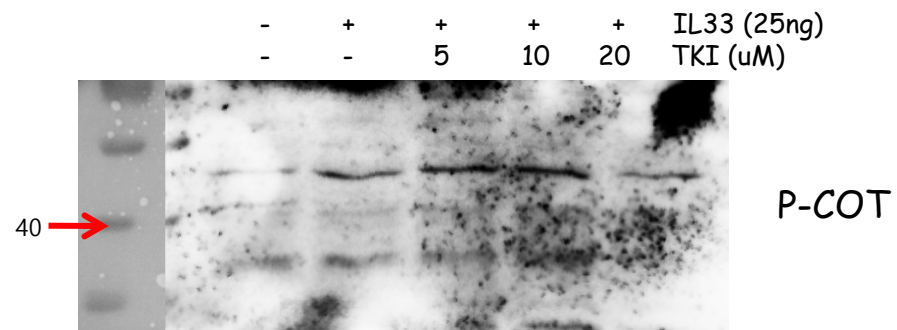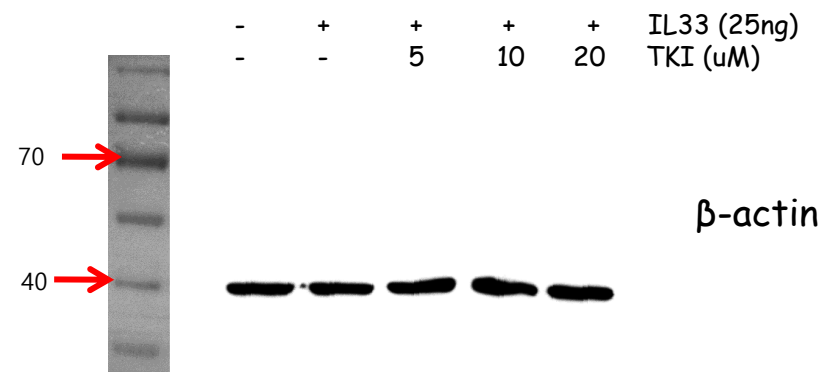

Figure3. A

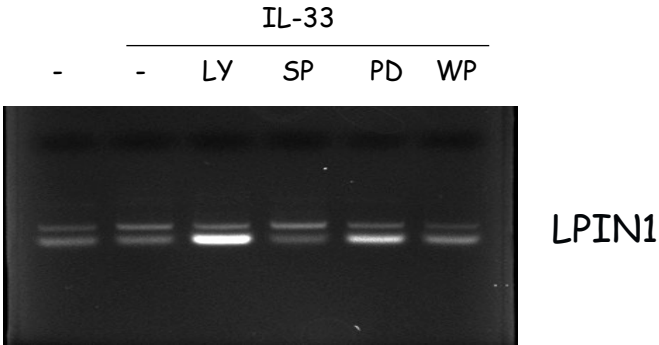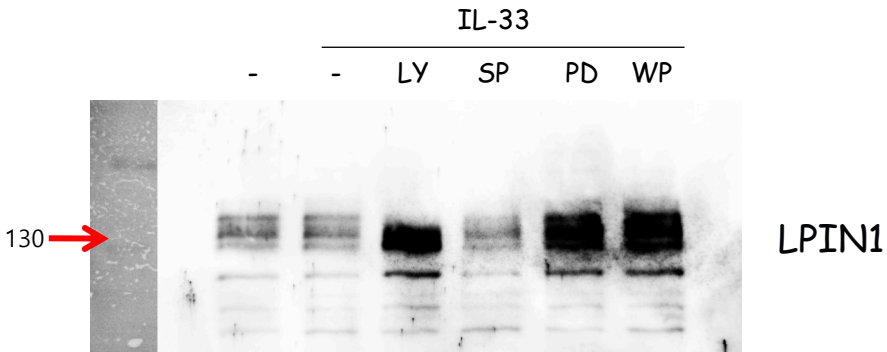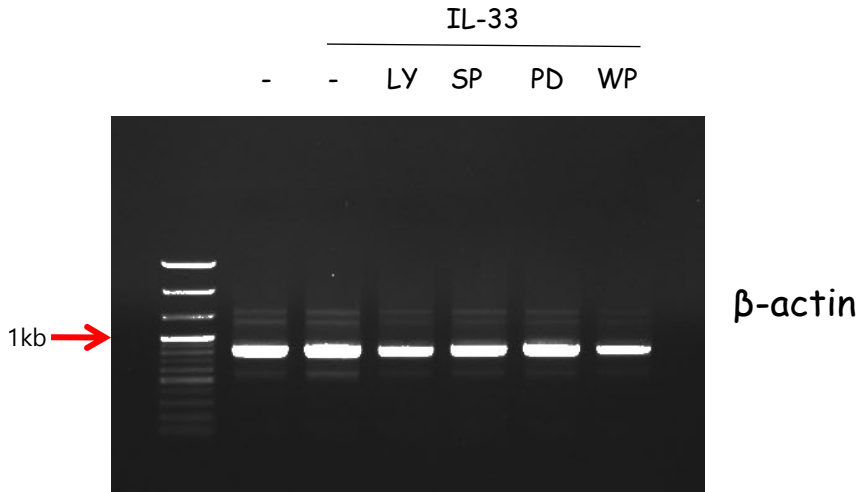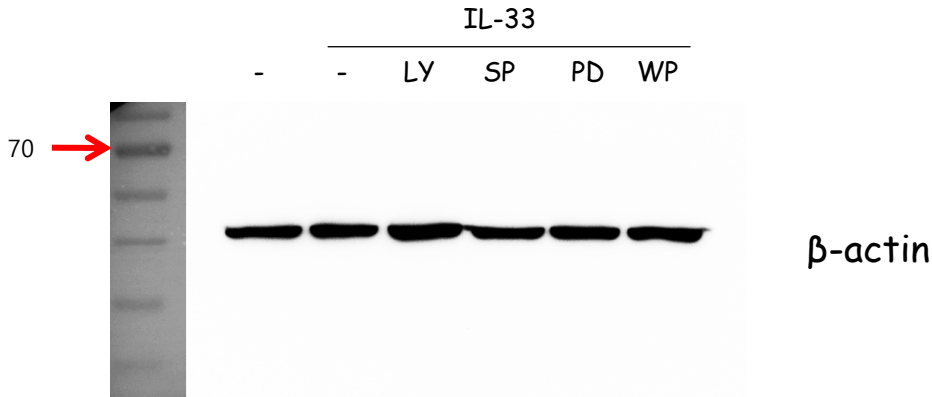

Figure3. B

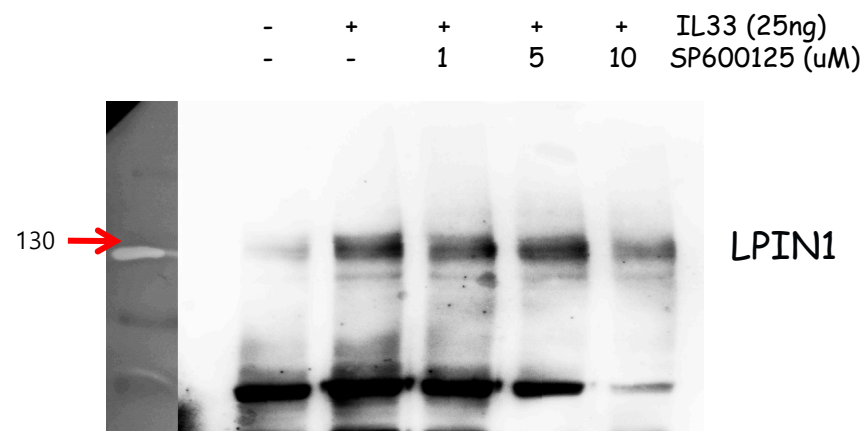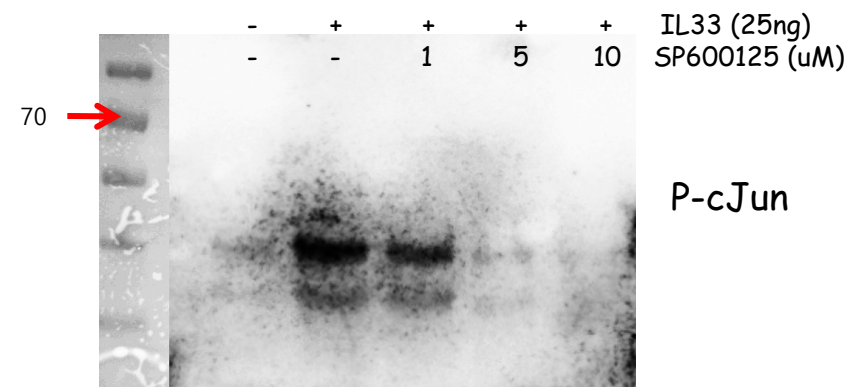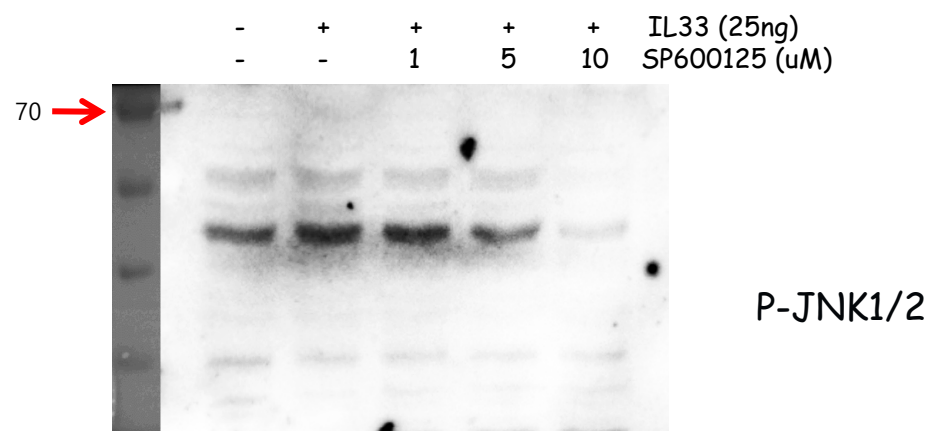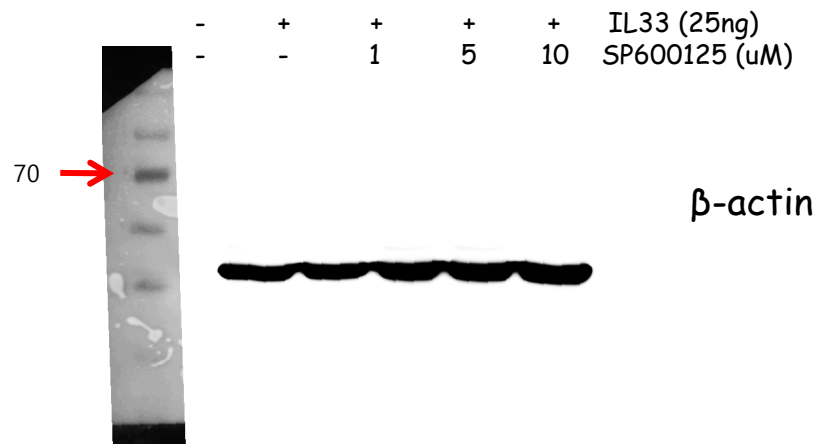

Figure3. C

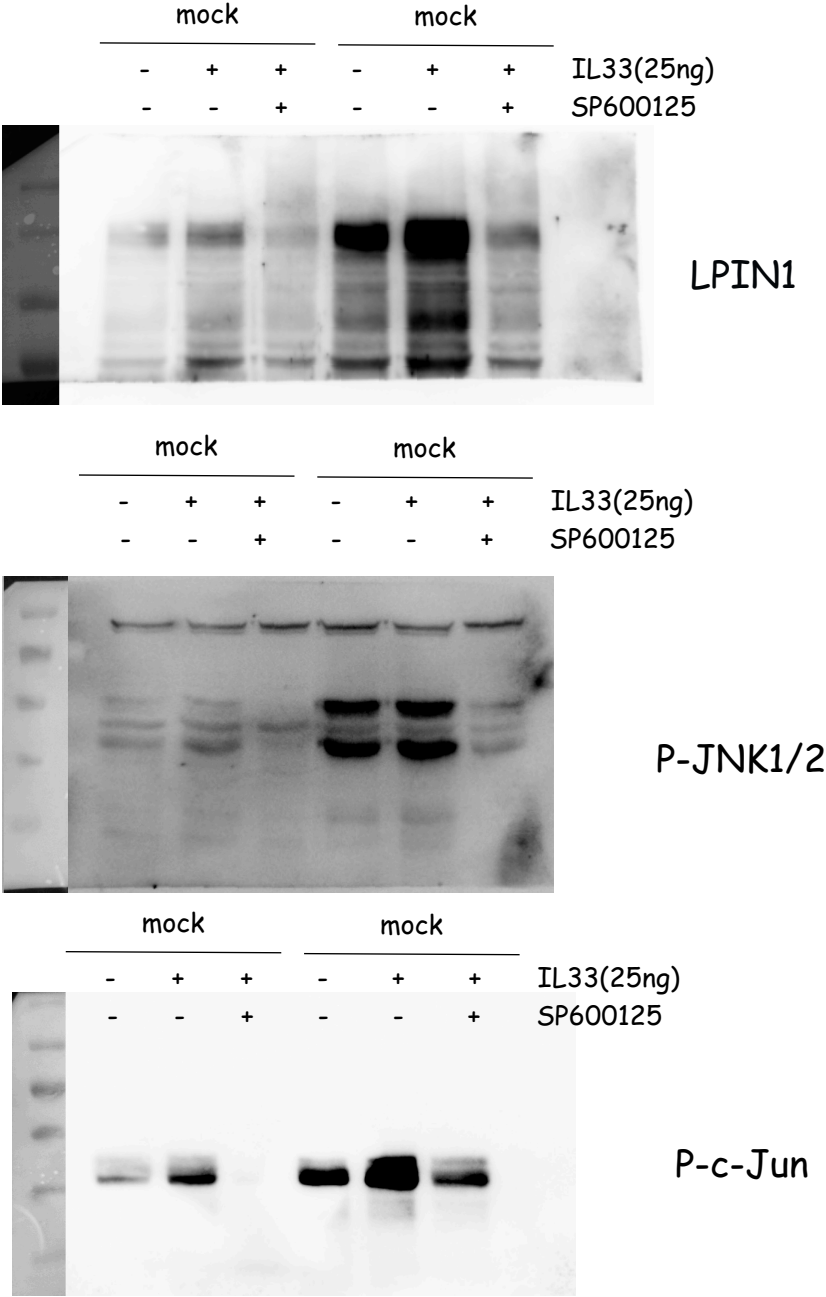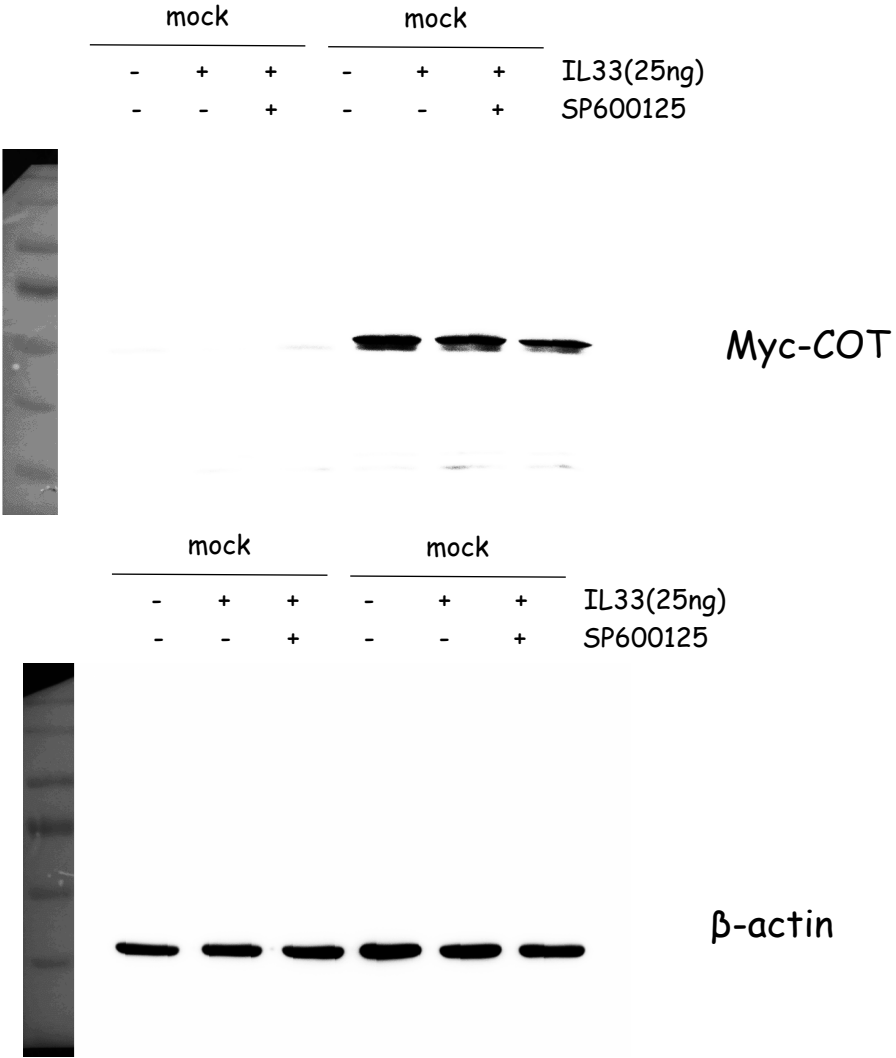

Figure3. D

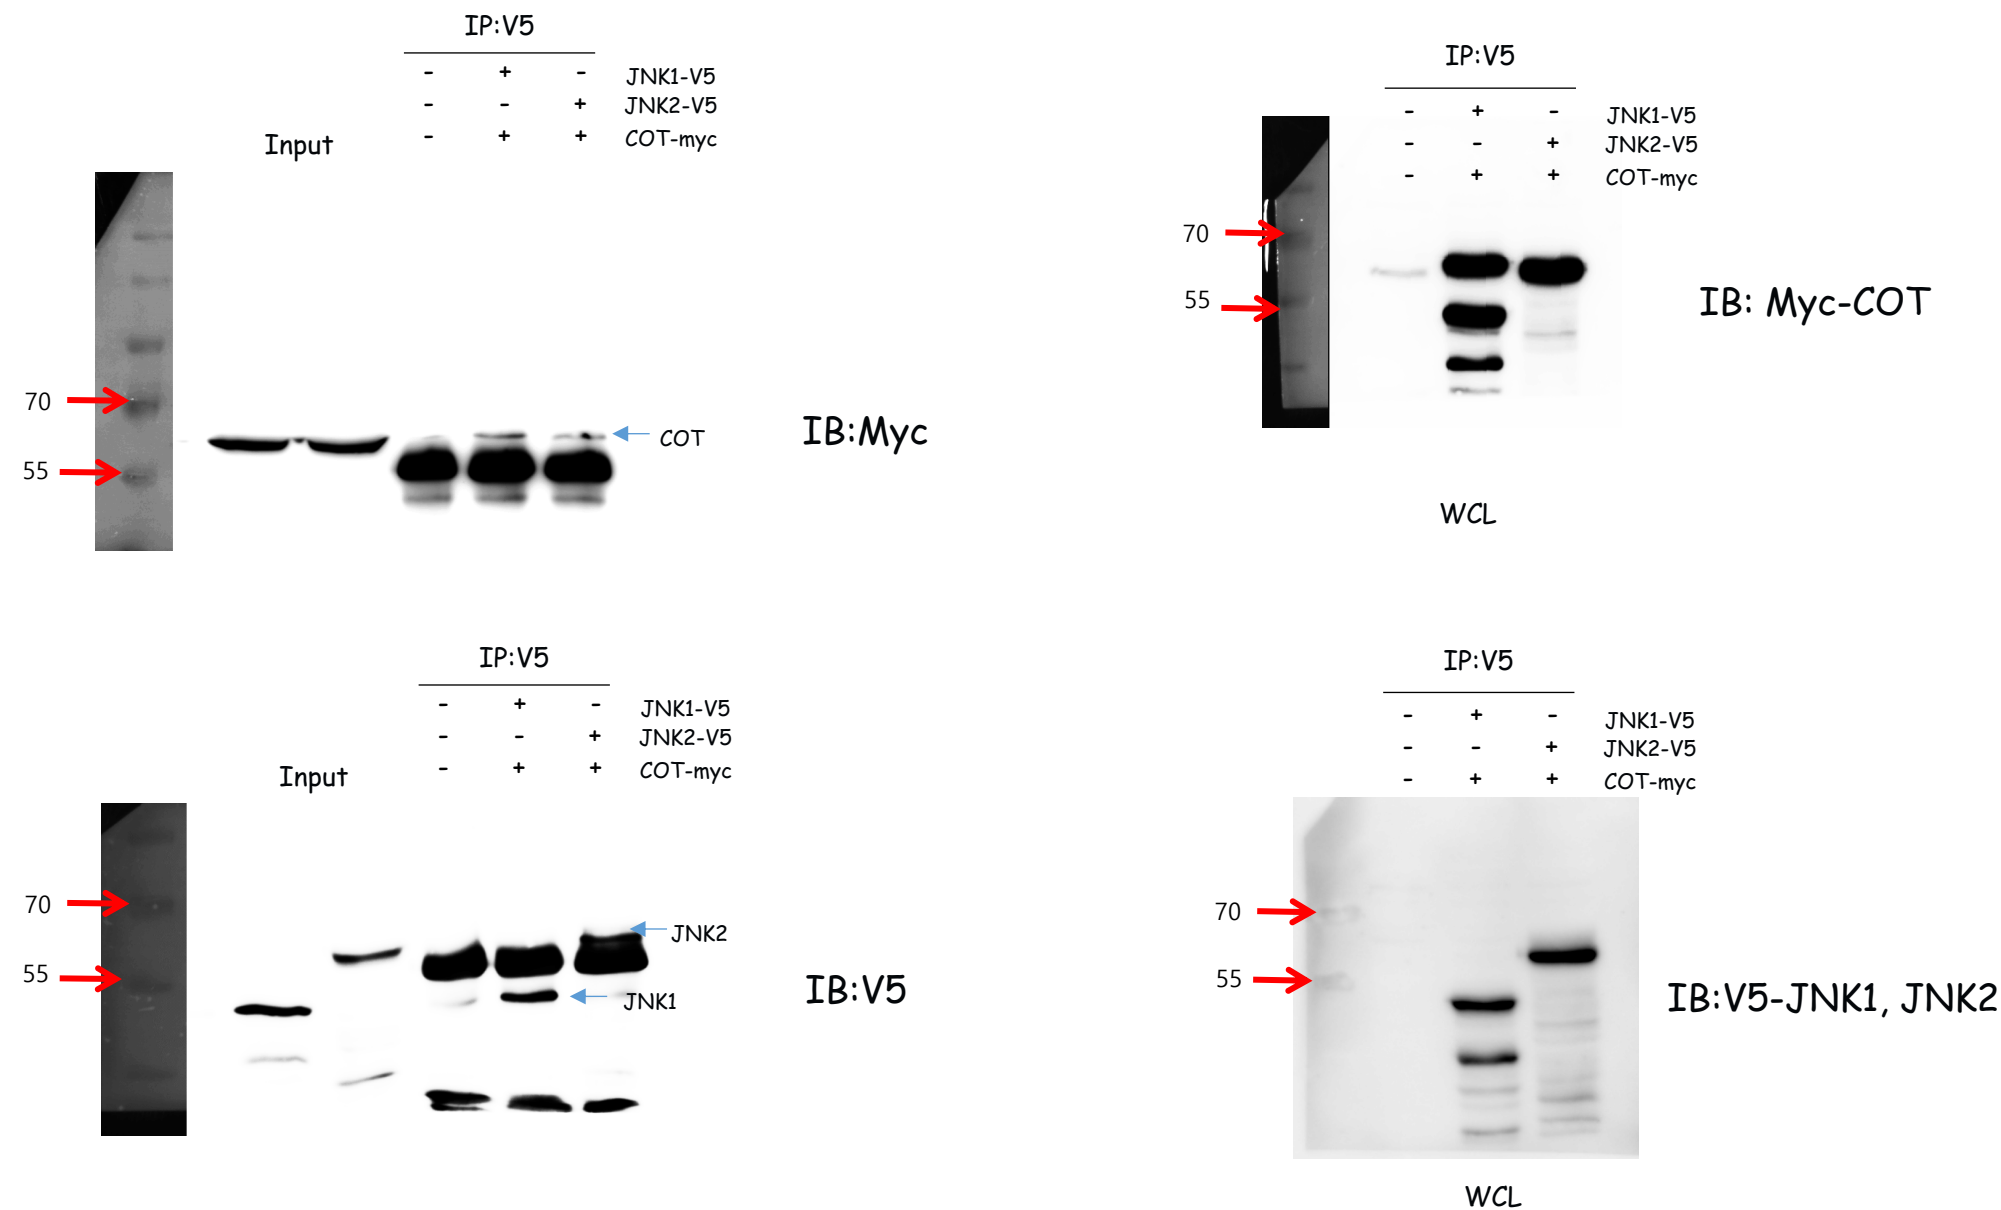

Figure3. E

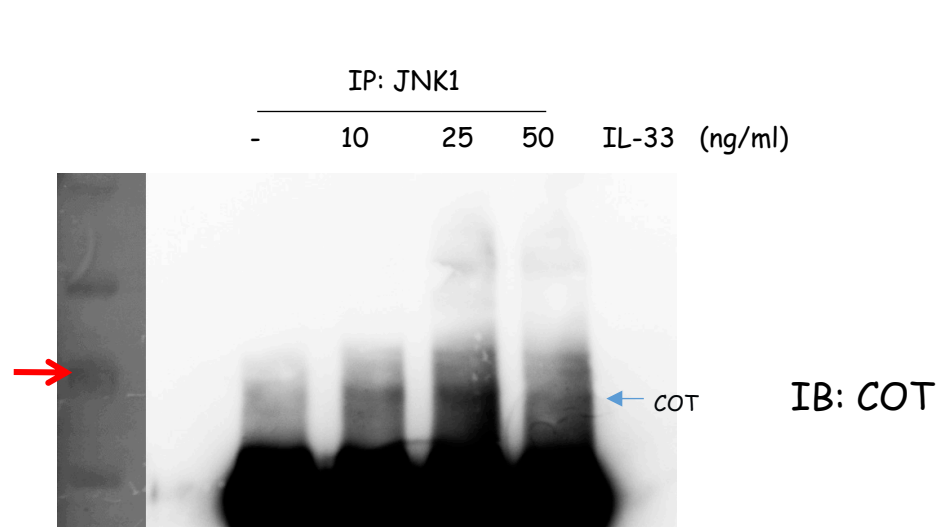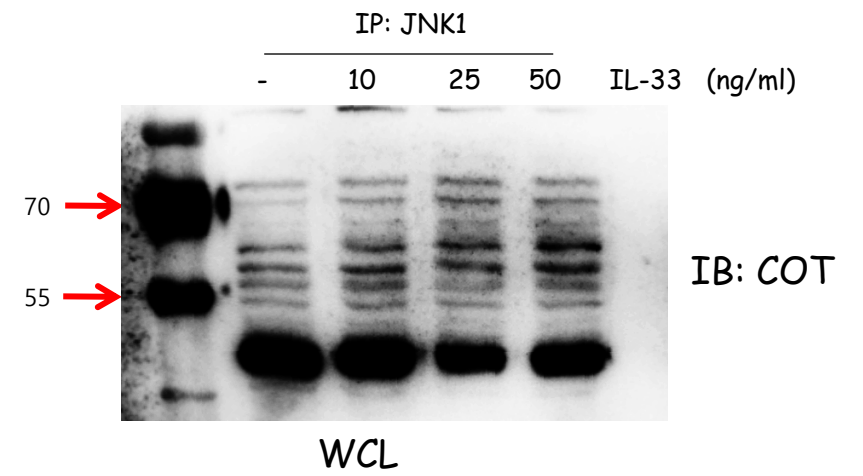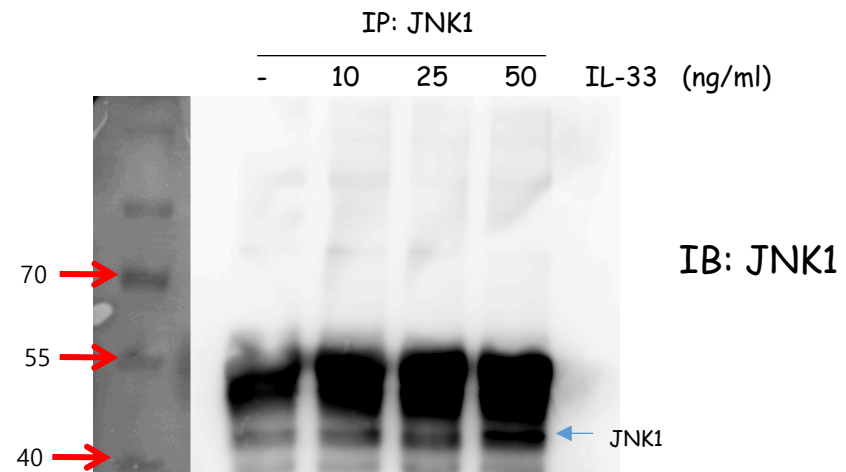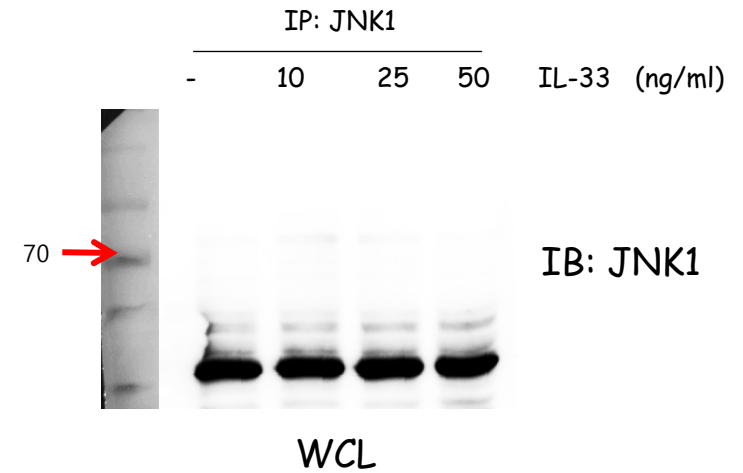

Figure3. F

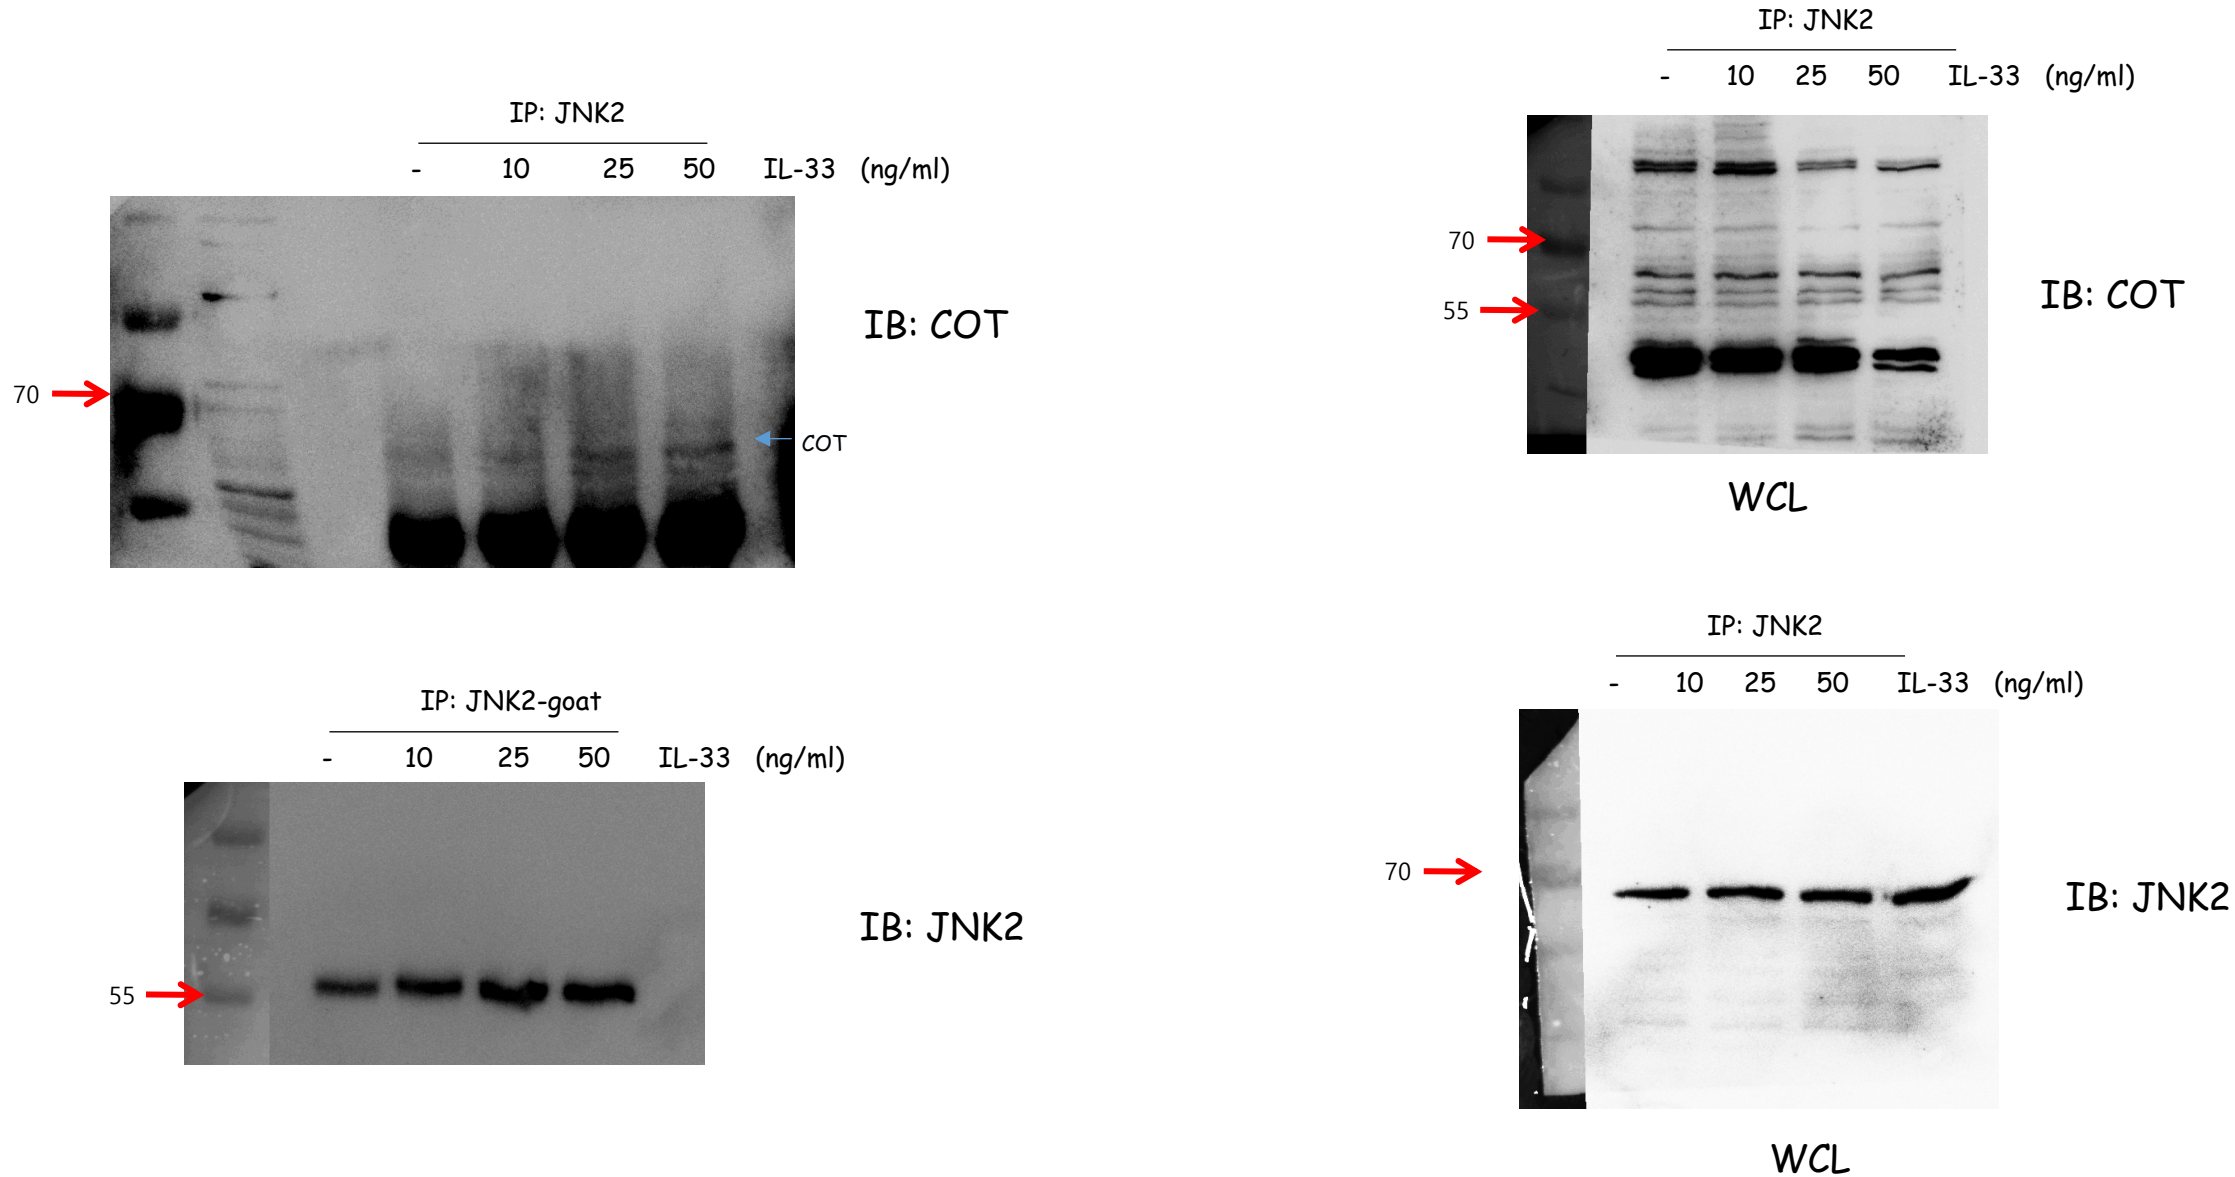

Figure 3. G

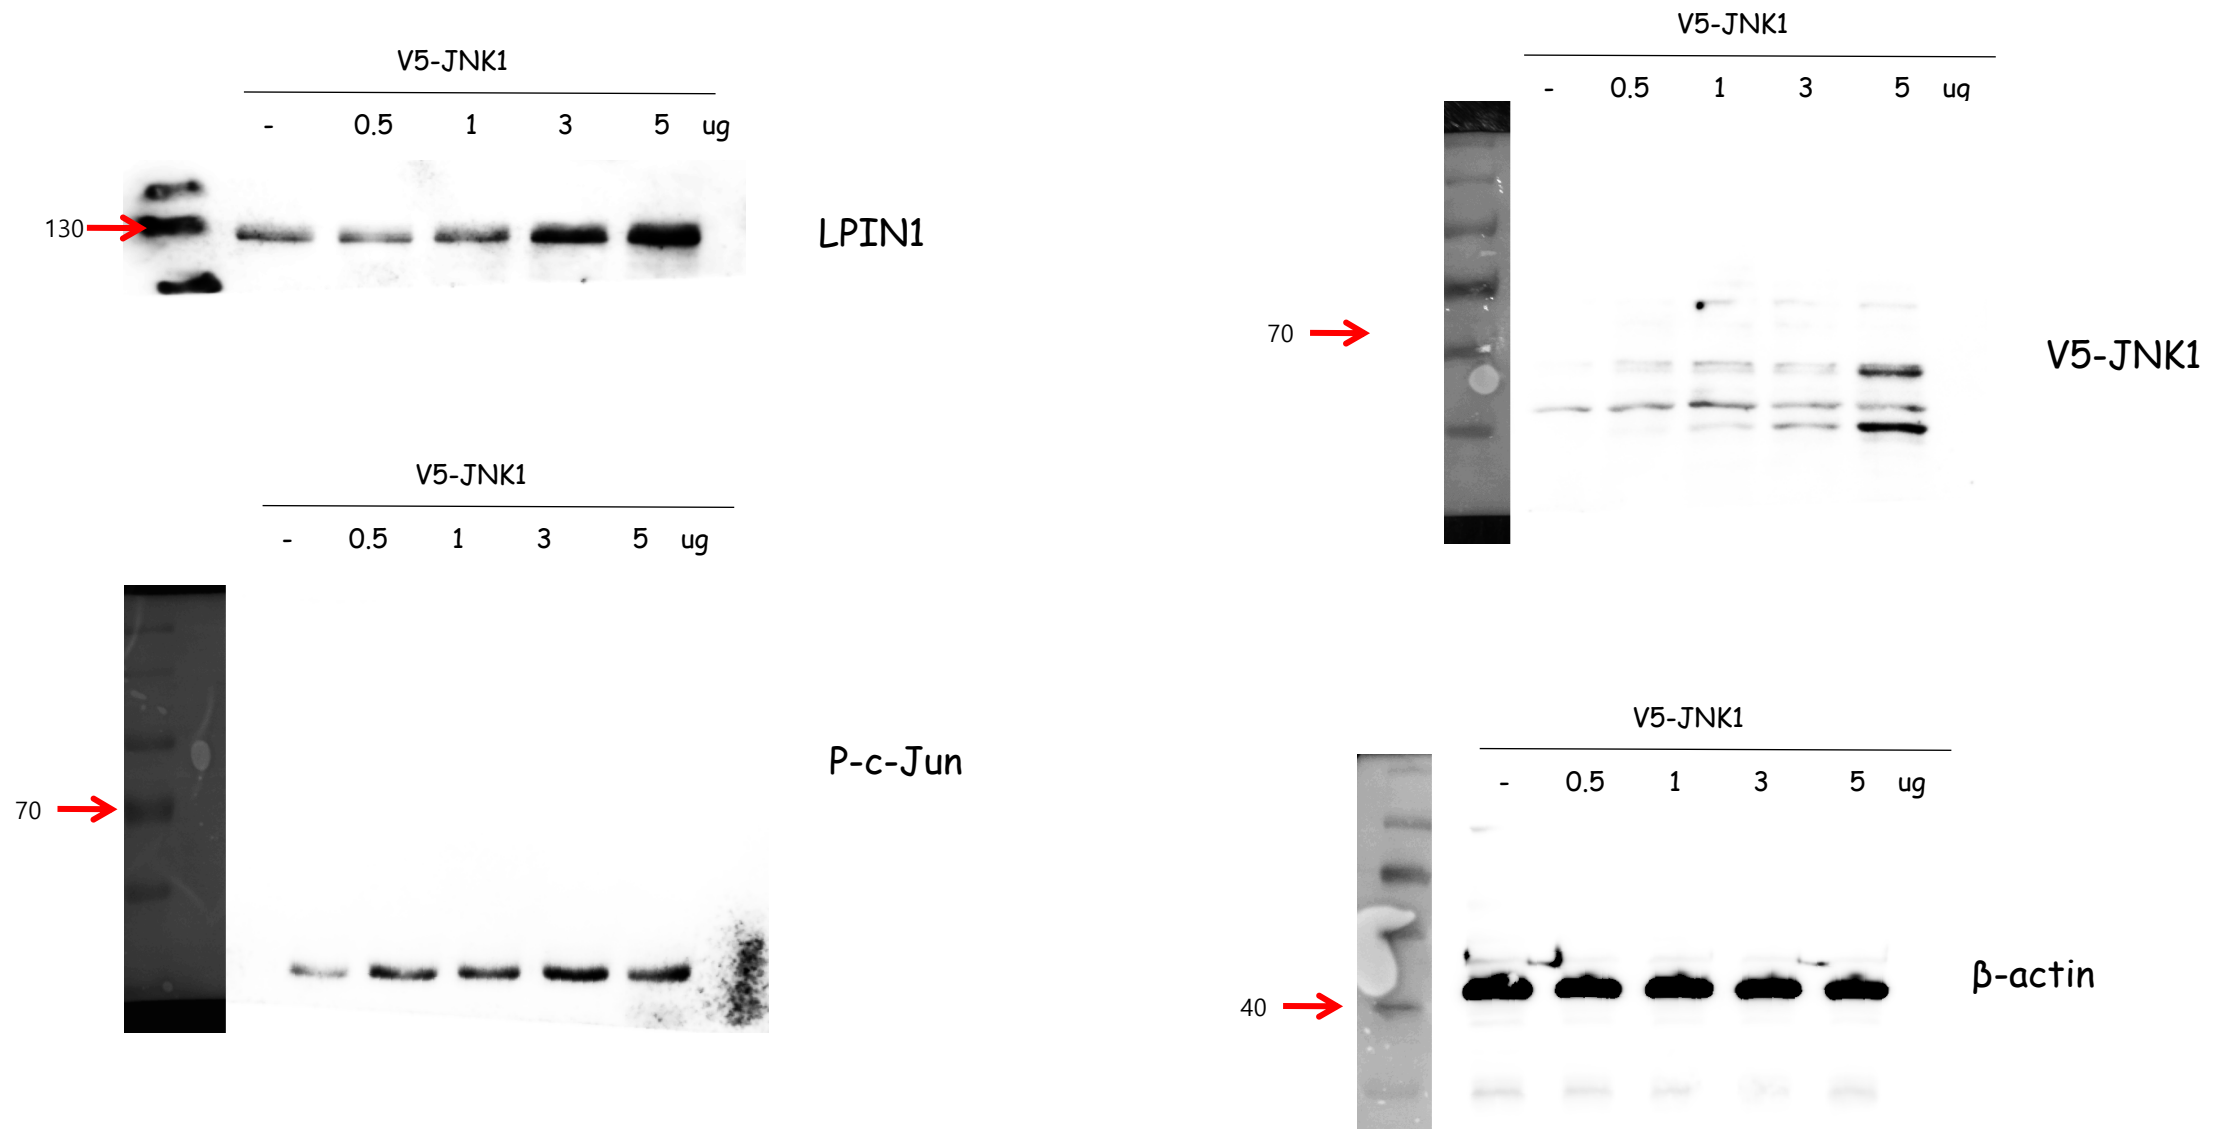



Figure3. G

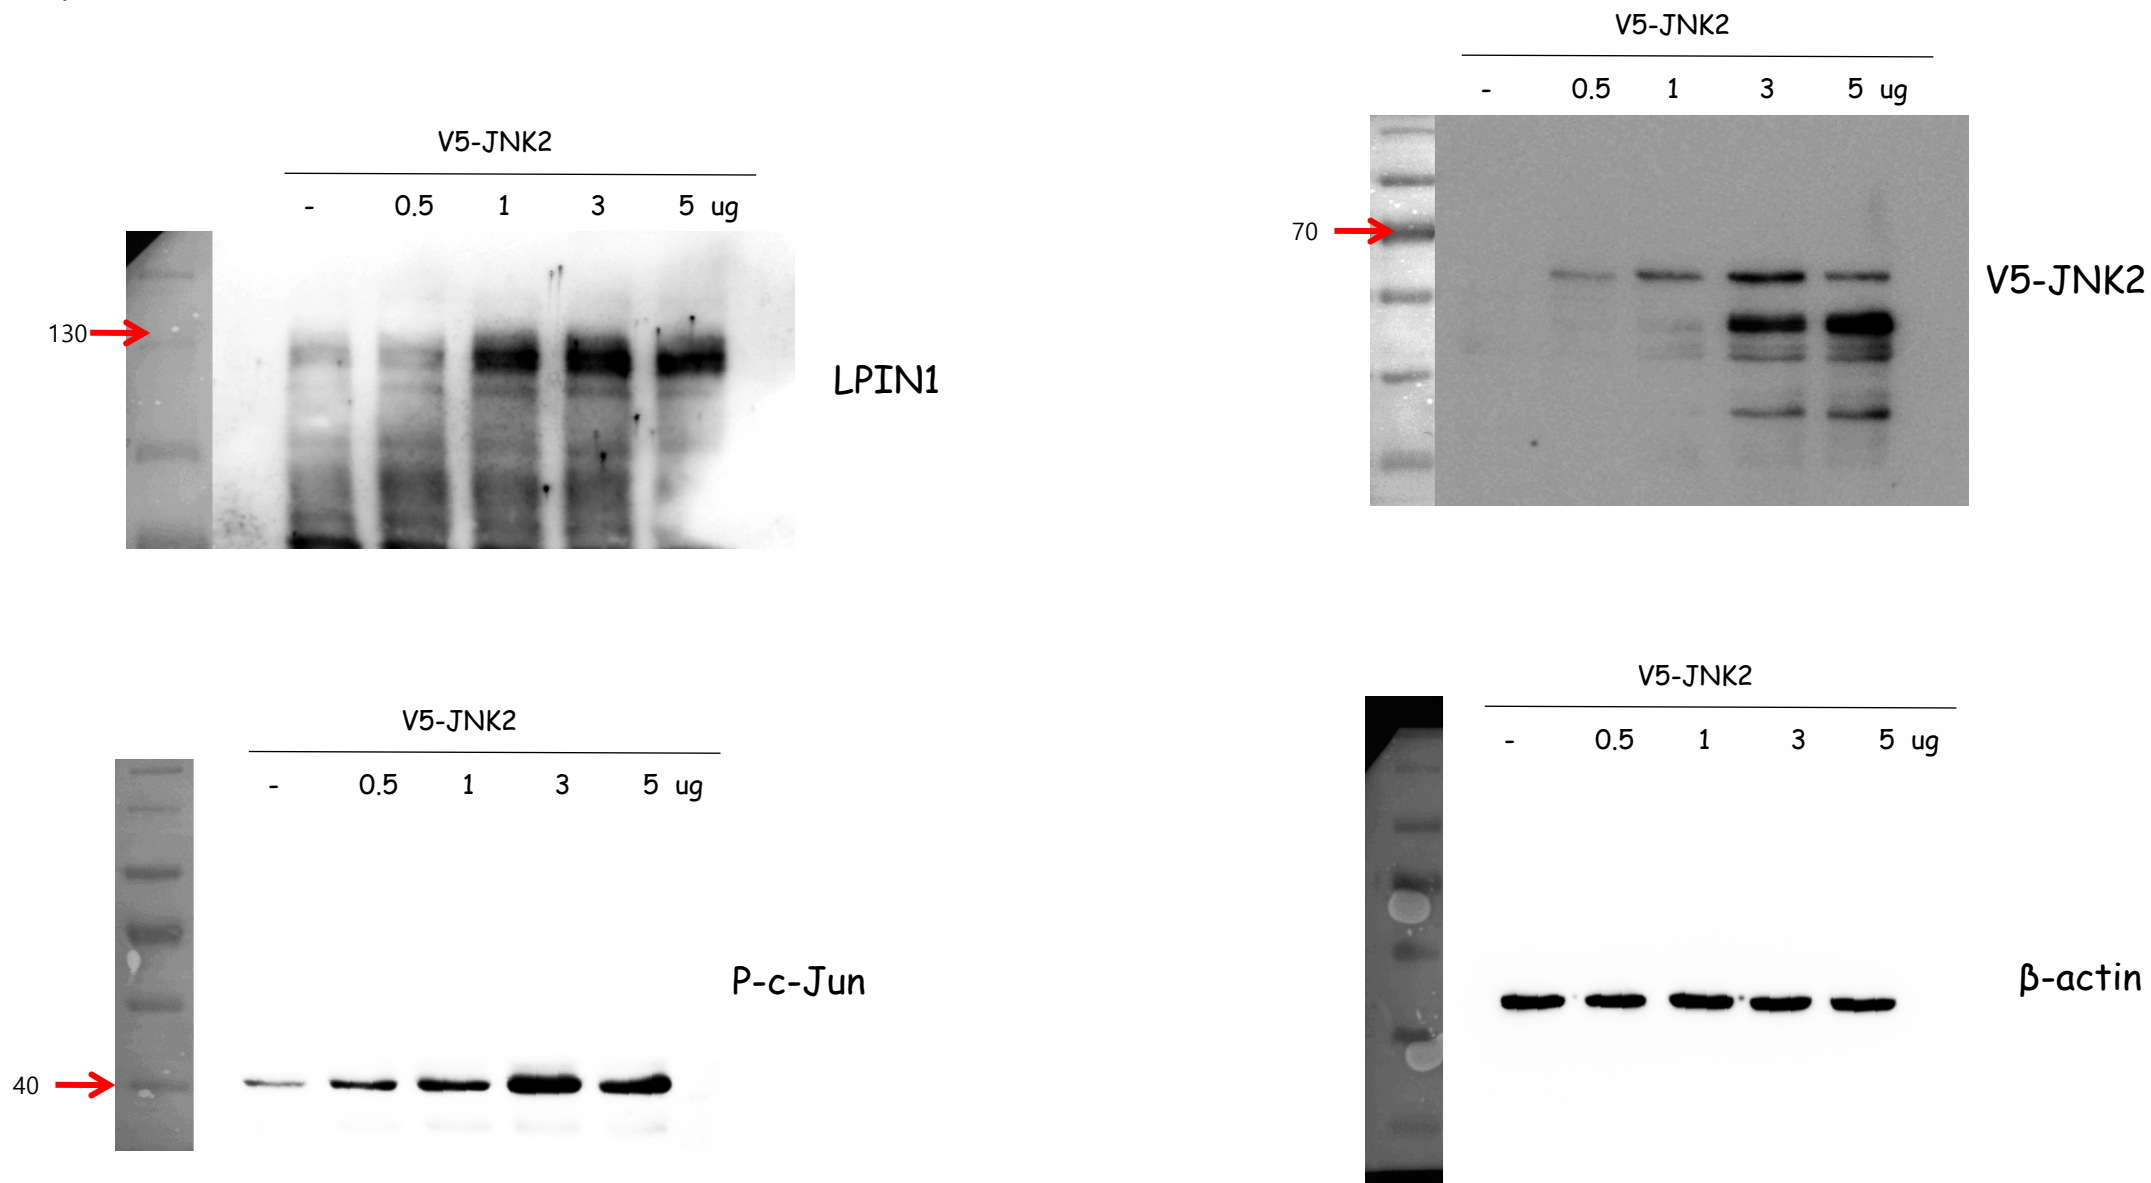

Figure3. H

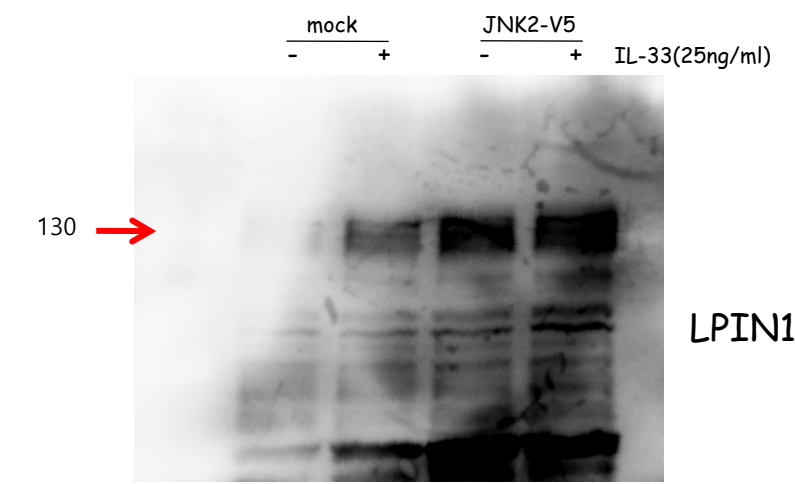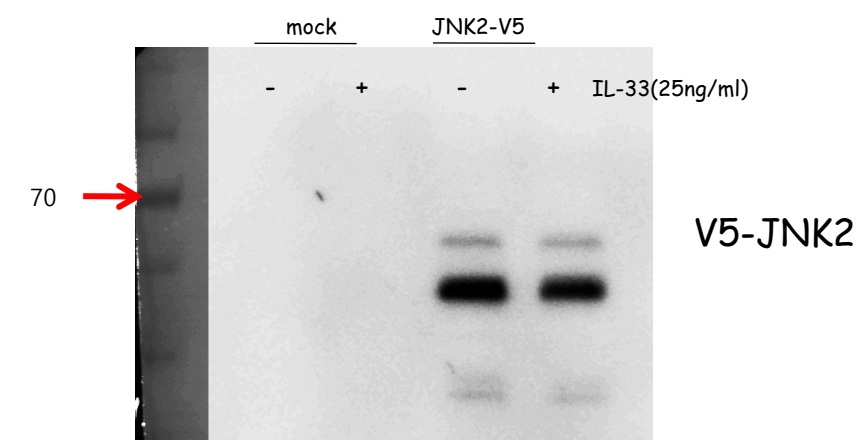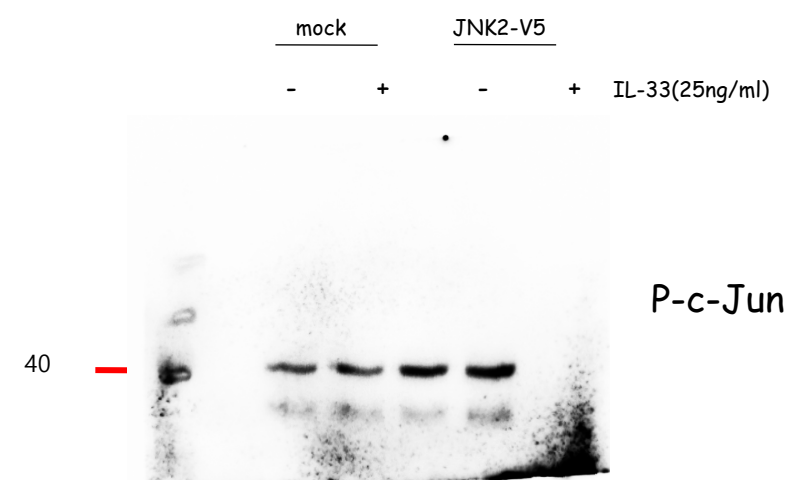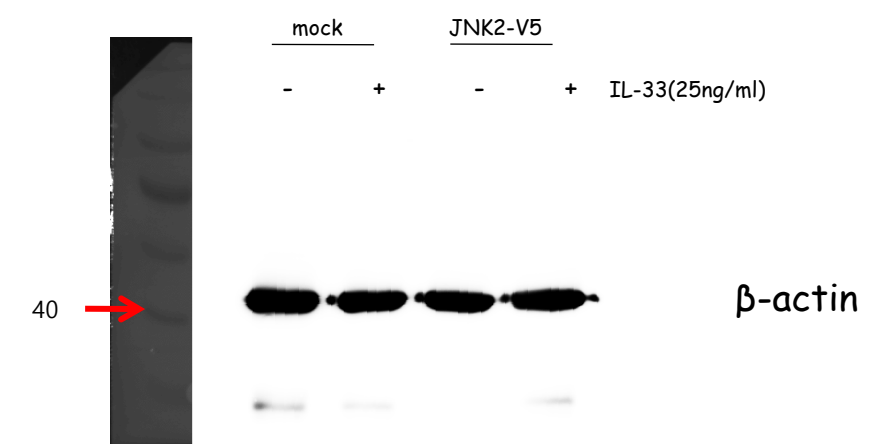

Figure3. H

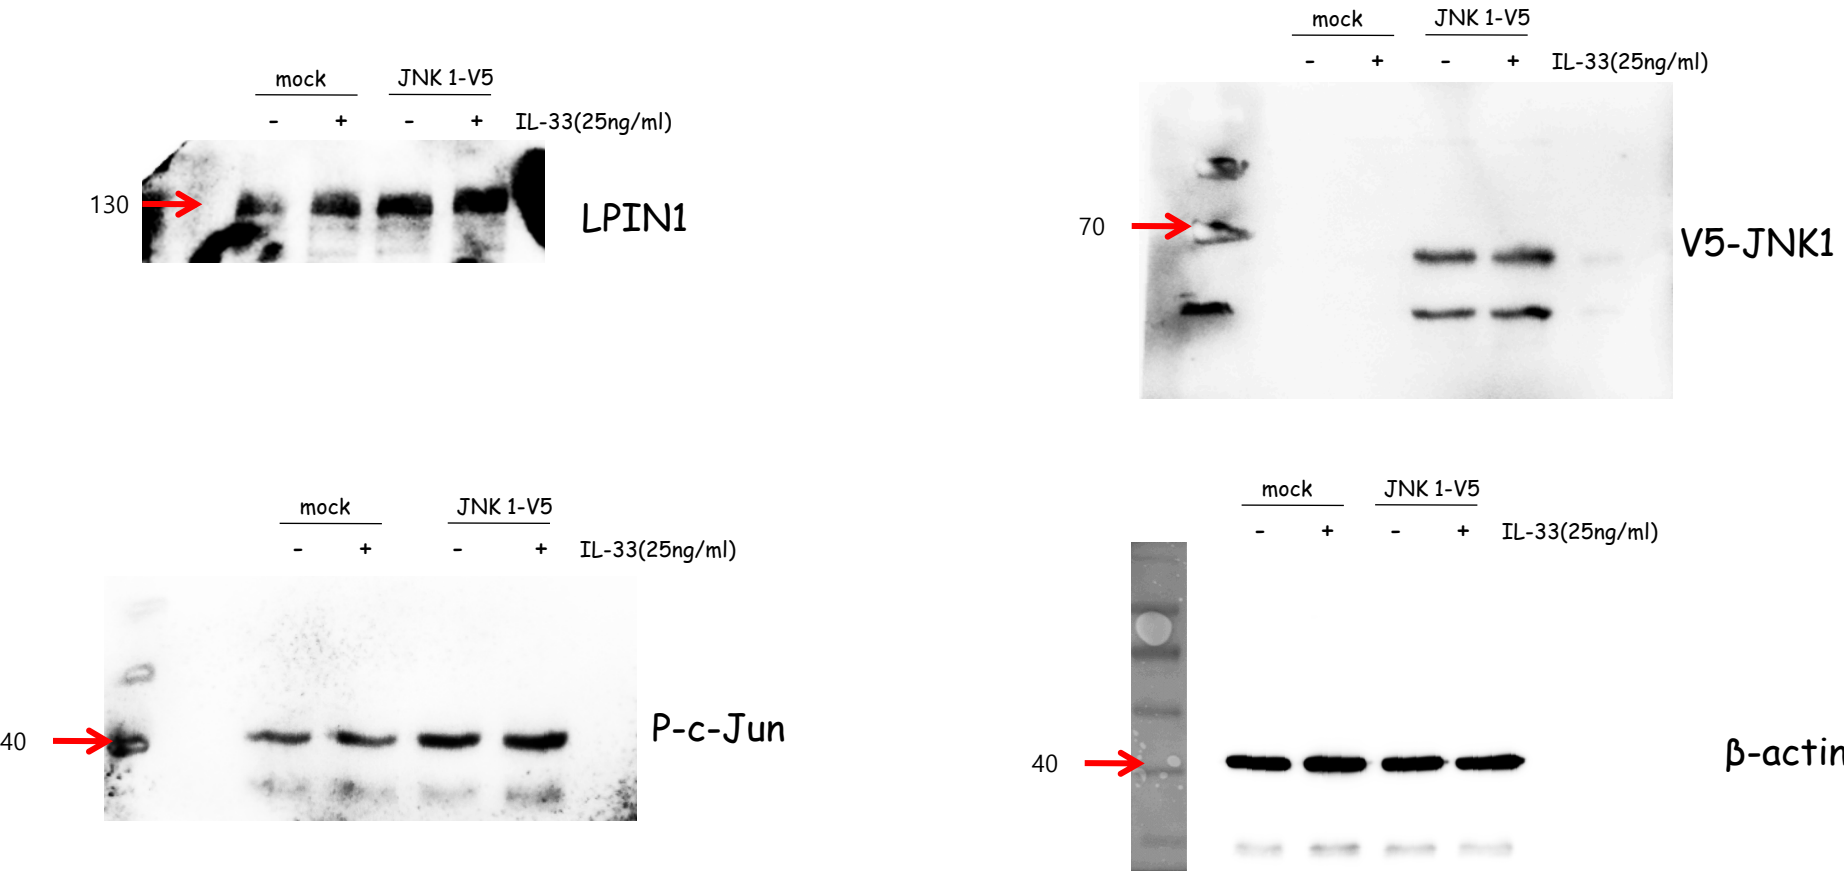

Figure3. I

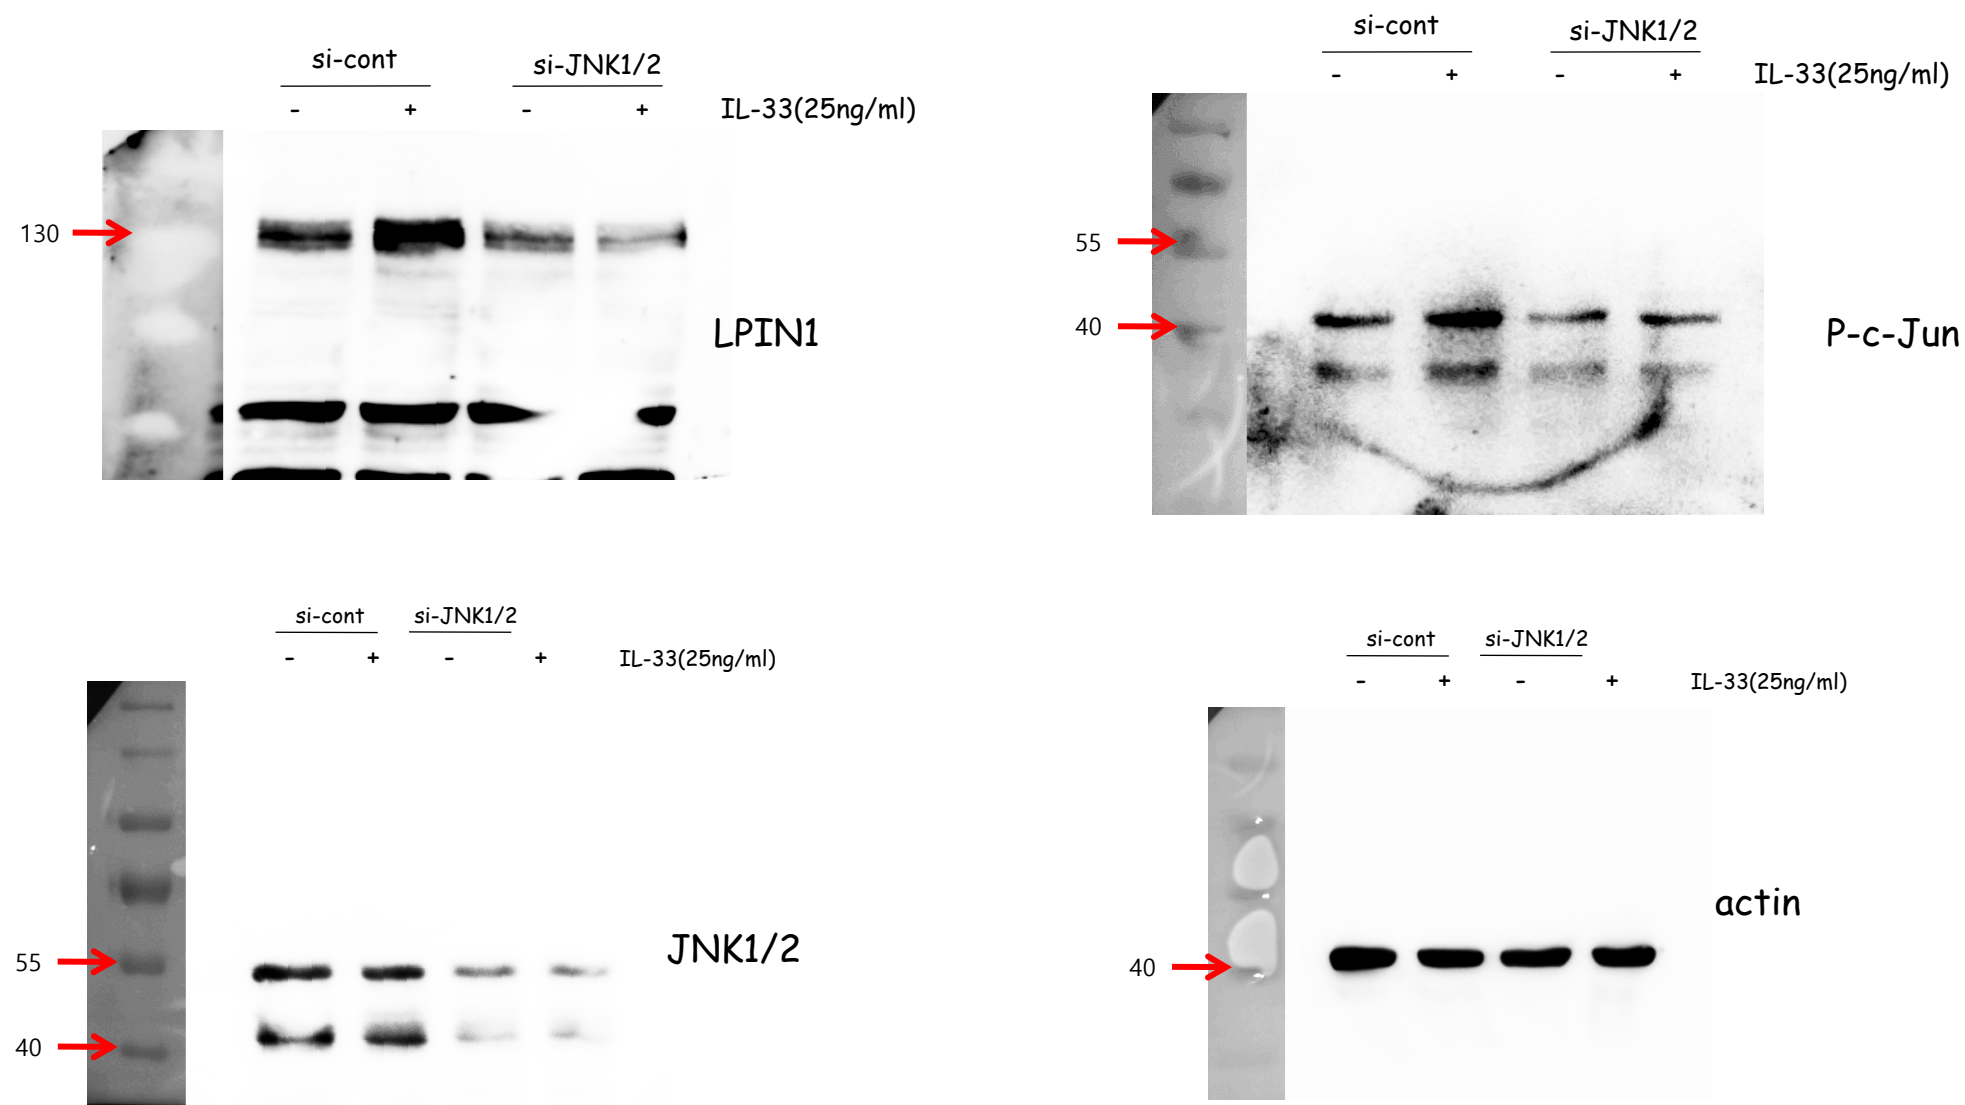

Figure4. A

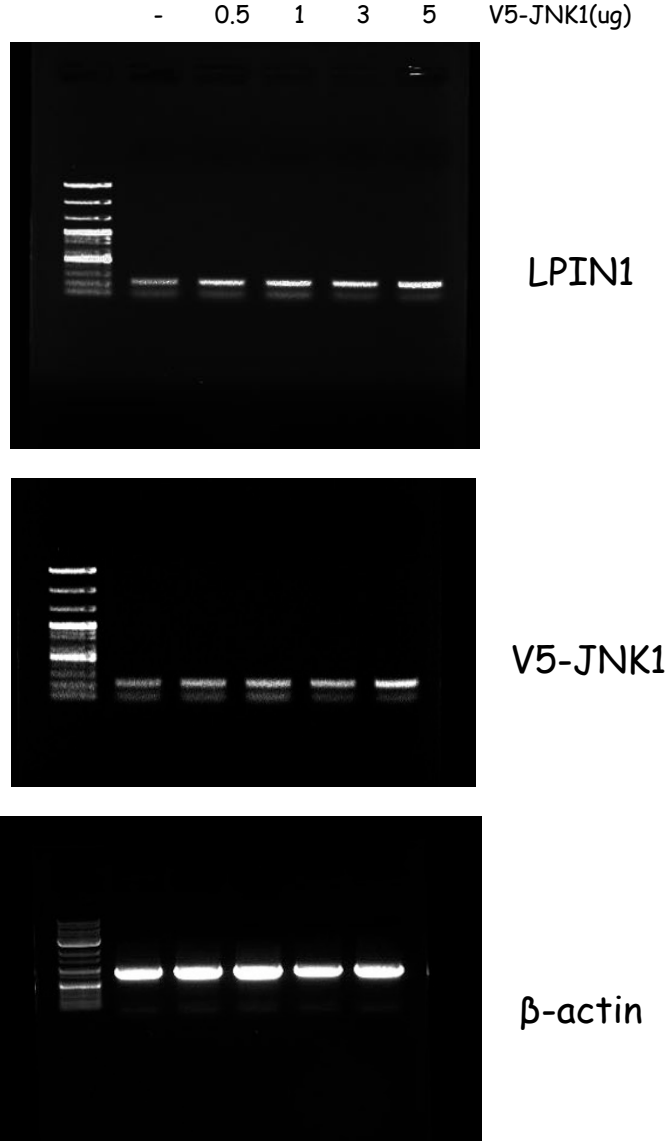

Figure4. B

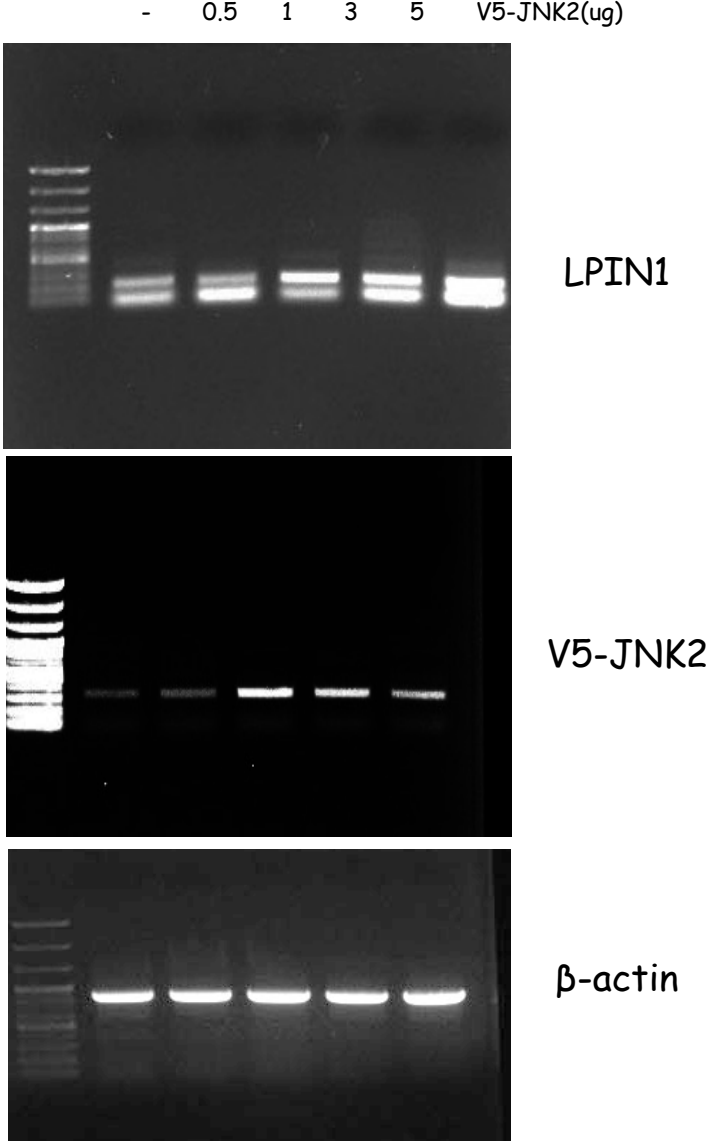

Figure4. C

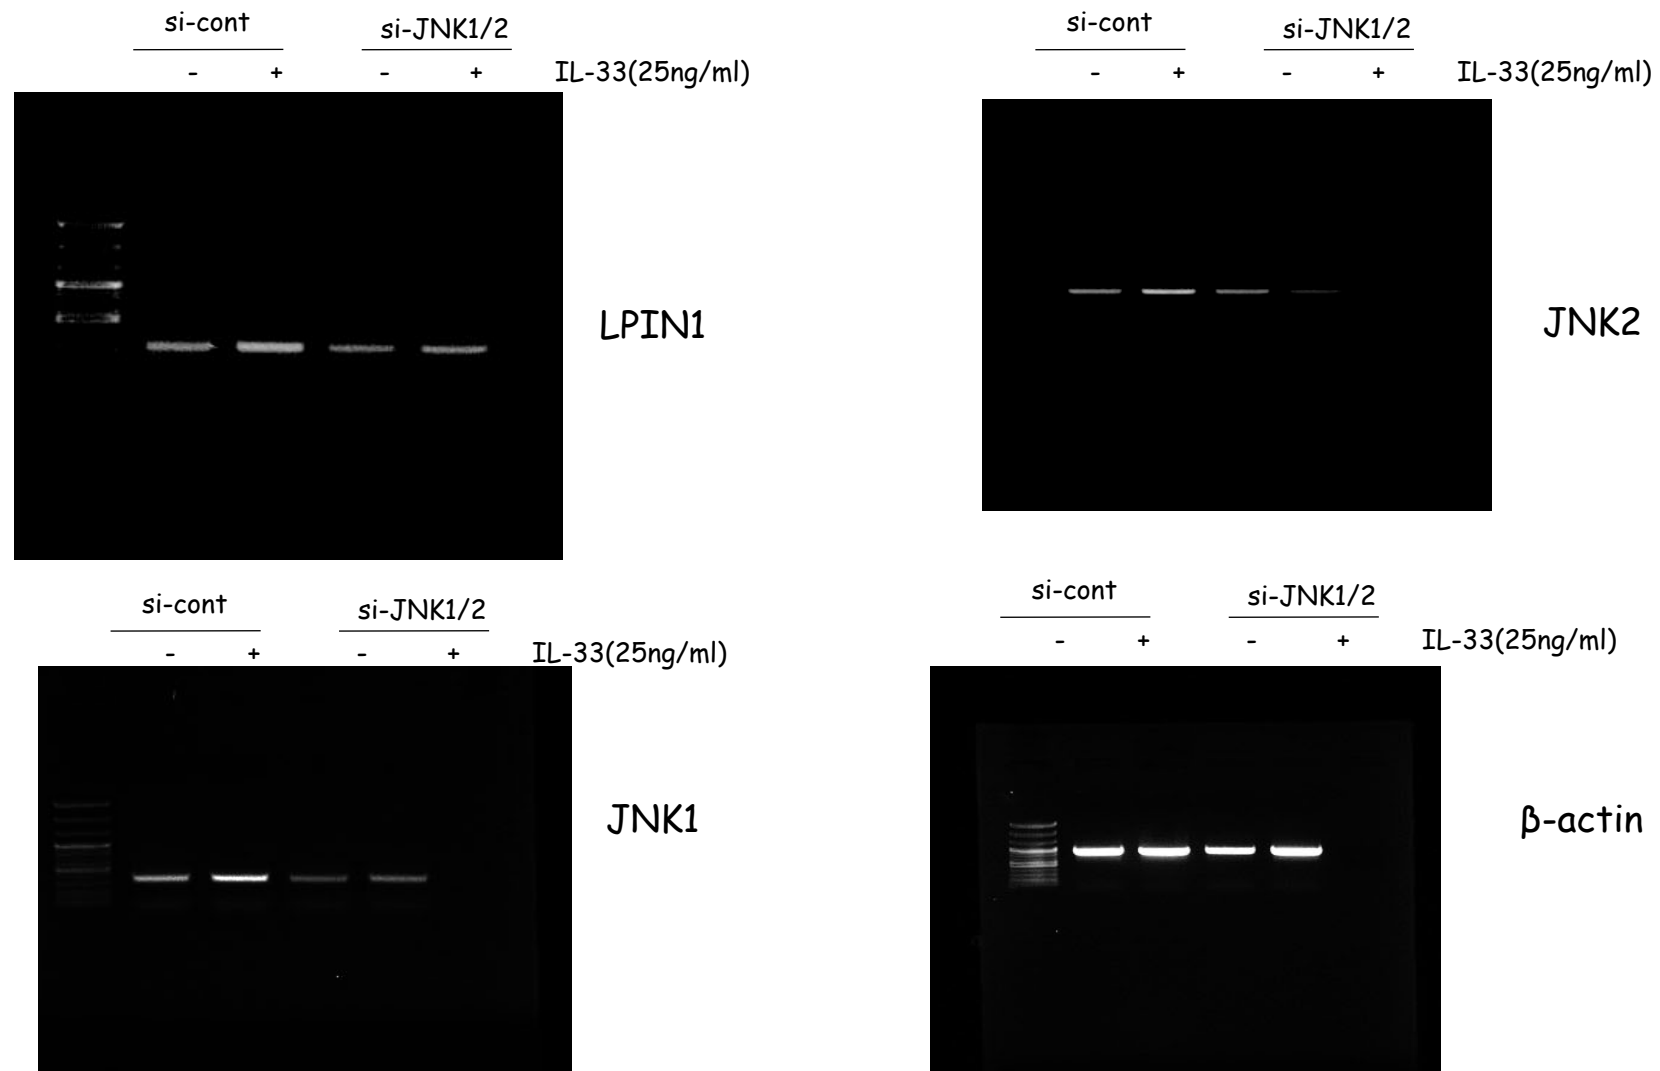

Figure4. D

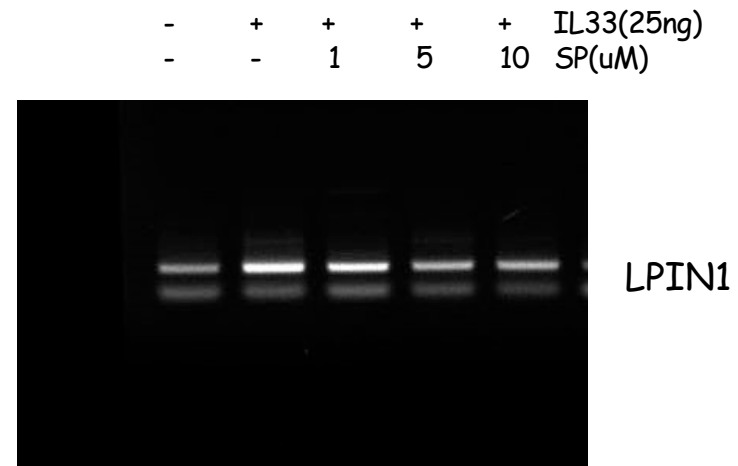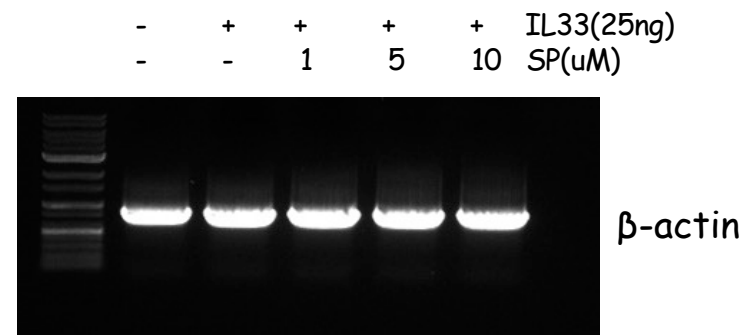

Figure 4. F

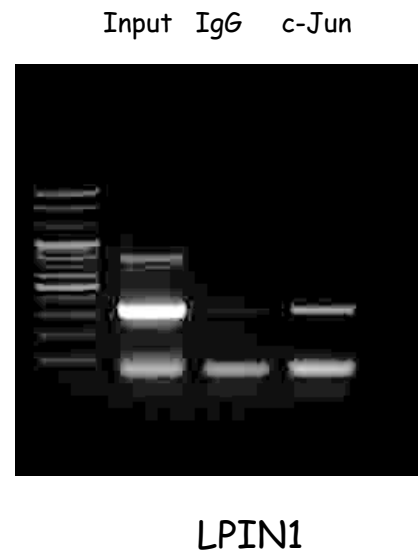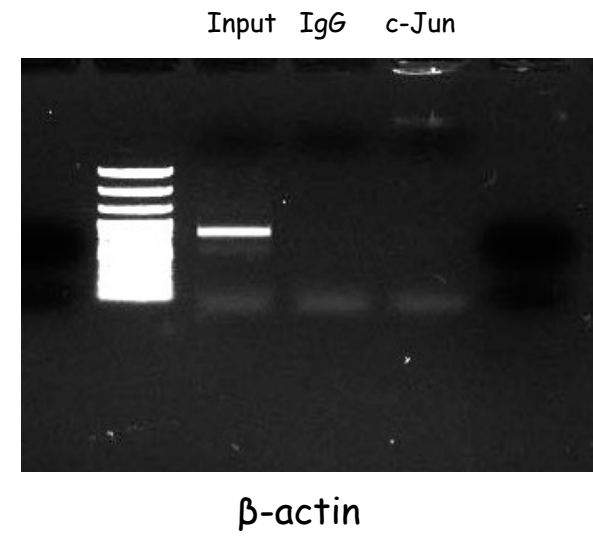



Figure4. F

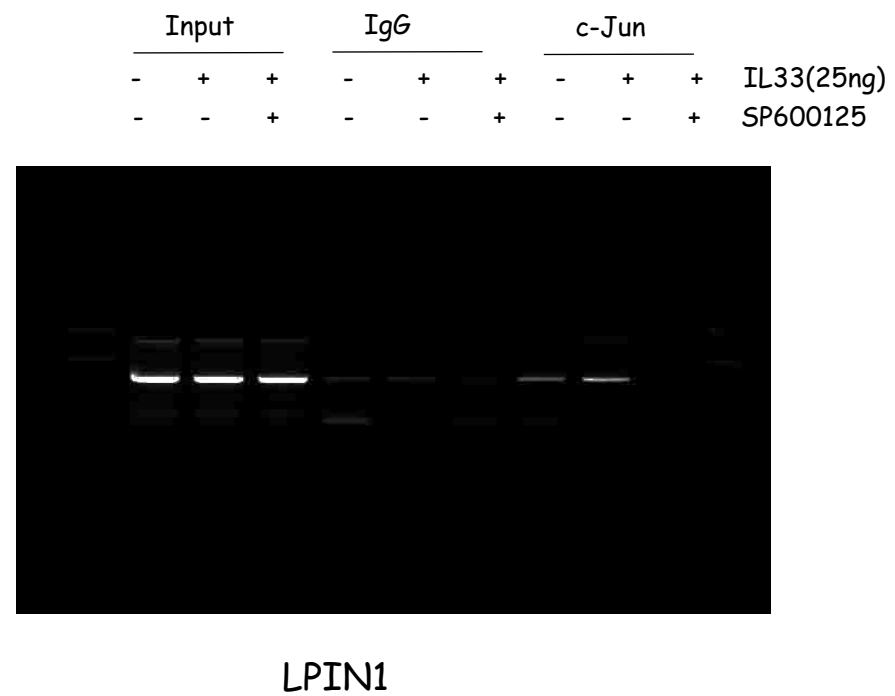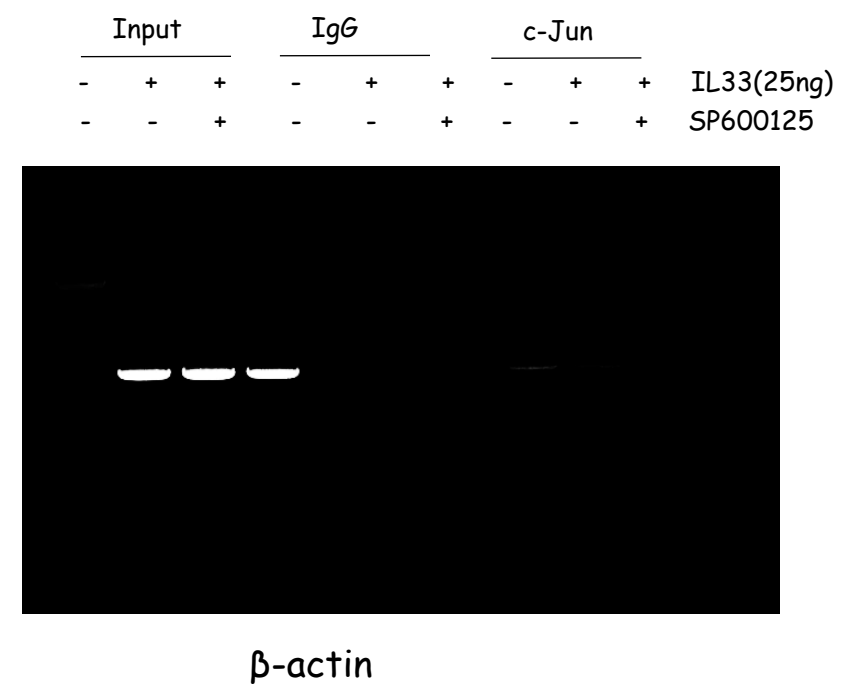

Figure 6. A

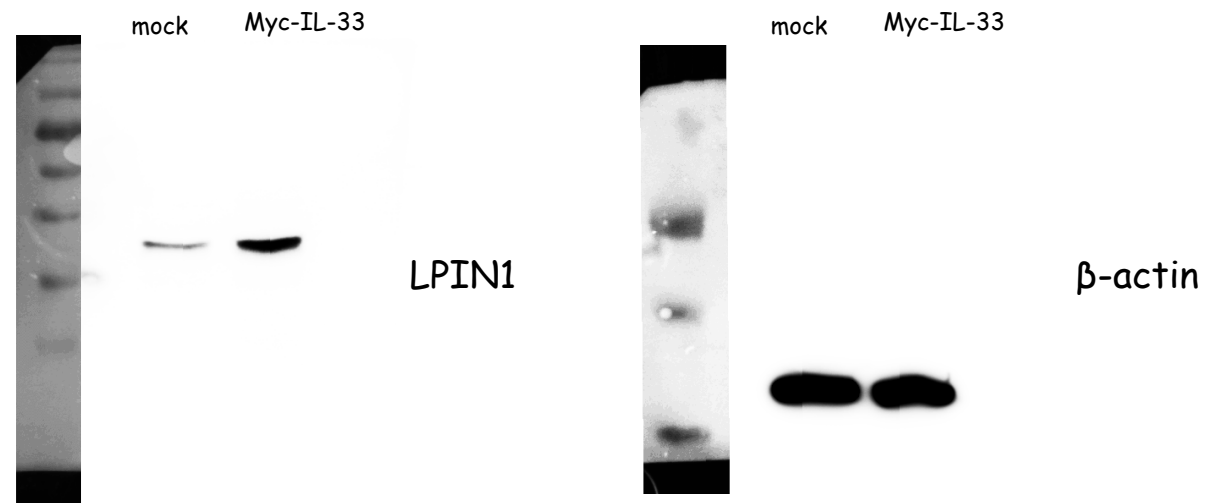

Supplement: s1 [file s1]
